# Supplementary material
Source: PubMed Central journal article supplement (PMC5384348)
Supplement: koni-06-03-1284723-s001.pdf [file koni-06-03-1284723-s001.pdf]

## Supplemental Information

# Assessment of tumor-infiltrating TCRV $\gamma$ 9V $\delta$ 2 $\gamma\delta$ lymphocyte abundance by deconvolution of human cancers microarrays

### Authors:

Marie Tosolini, Frédéric Pont, Mary Poupot, François Vergez, Marie-Laure Nicolau-Travers, David Vermijlen, Jean-Emmanuel Sarry, Francesco Dieli, & Jean-Jacques Fournié

## **Supplemental Figures**

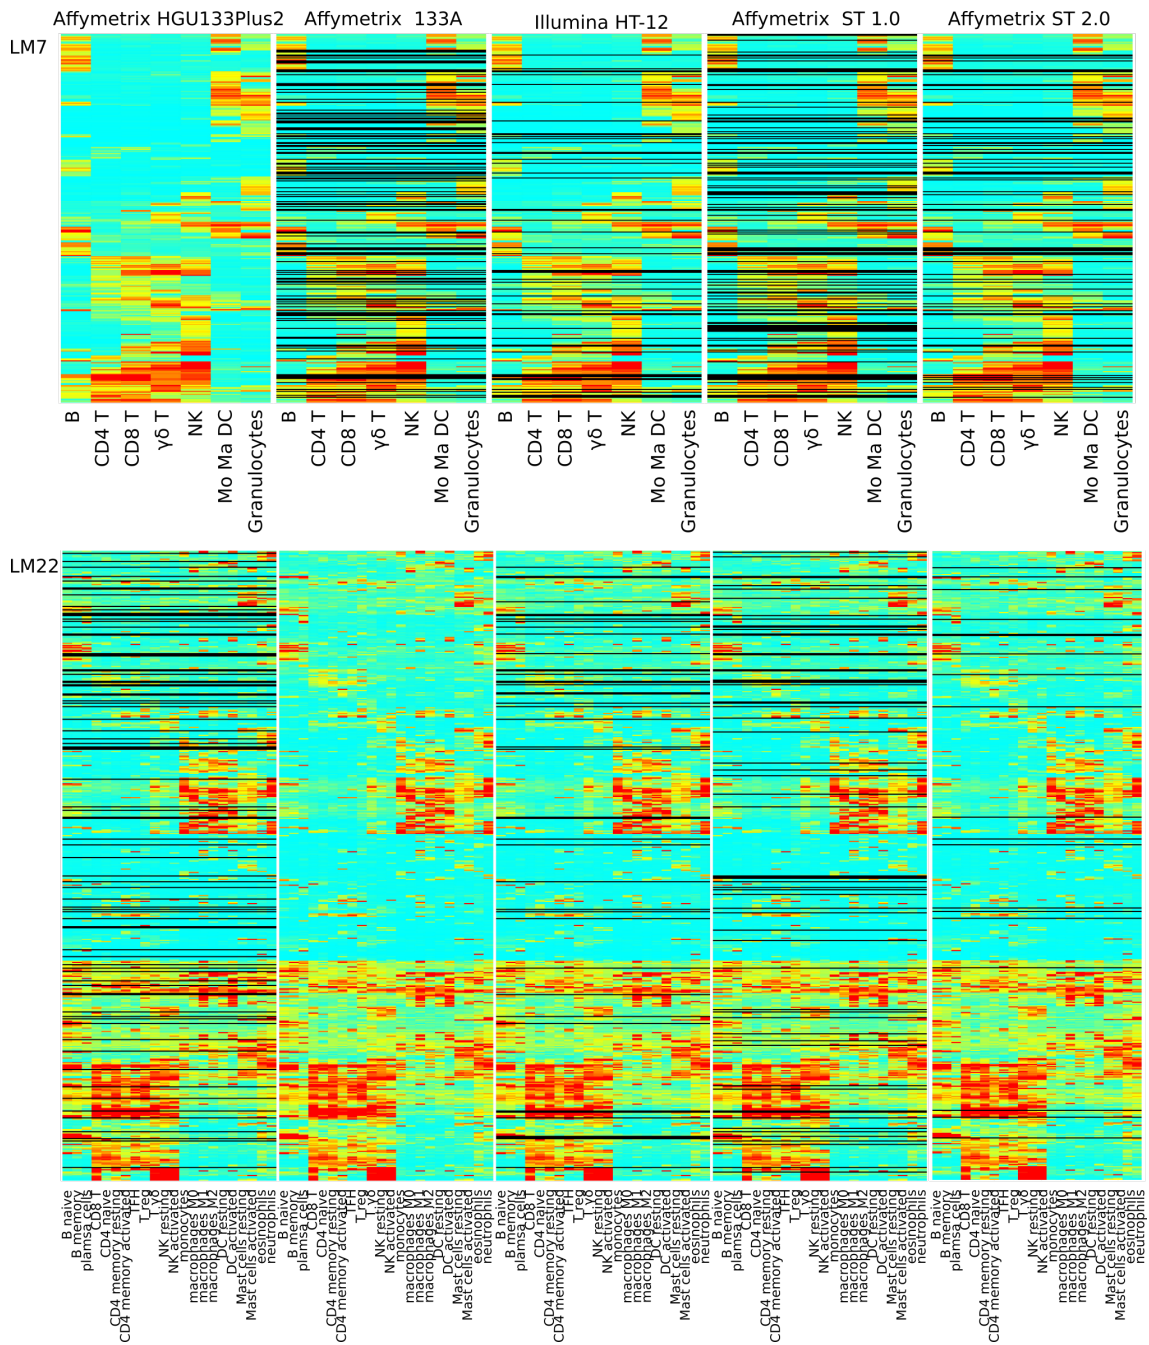

**Supplemental Figure 1: Gene coverage of LM7 and LM22 by various microarray platforms**

LM7 and LM22 are represented as genes (lines), cell subsets (columns) and expression levels (shown by a color gradient scale, blue: expression levels < 200, yellow : 200-1000, red: >1000). Black lines: missing genes. Of the 375 genes from LM7, the HGU133A platform lacks 117 genes, Illumina HT-12 lacks 50 genes, Affymetrix ST1.0 lacks 95 genes and Affymetrix ST2.0 lacks 85 genes. Of the 547 genes from LM22, the HGU133 Plus2.0 platform lacks 82 genes, Illumina HT-12 lacks 43 genes, Affymetrix ST1.0 lacks 111 genes and Affymetrix ST2.0 lacks 71 genes.

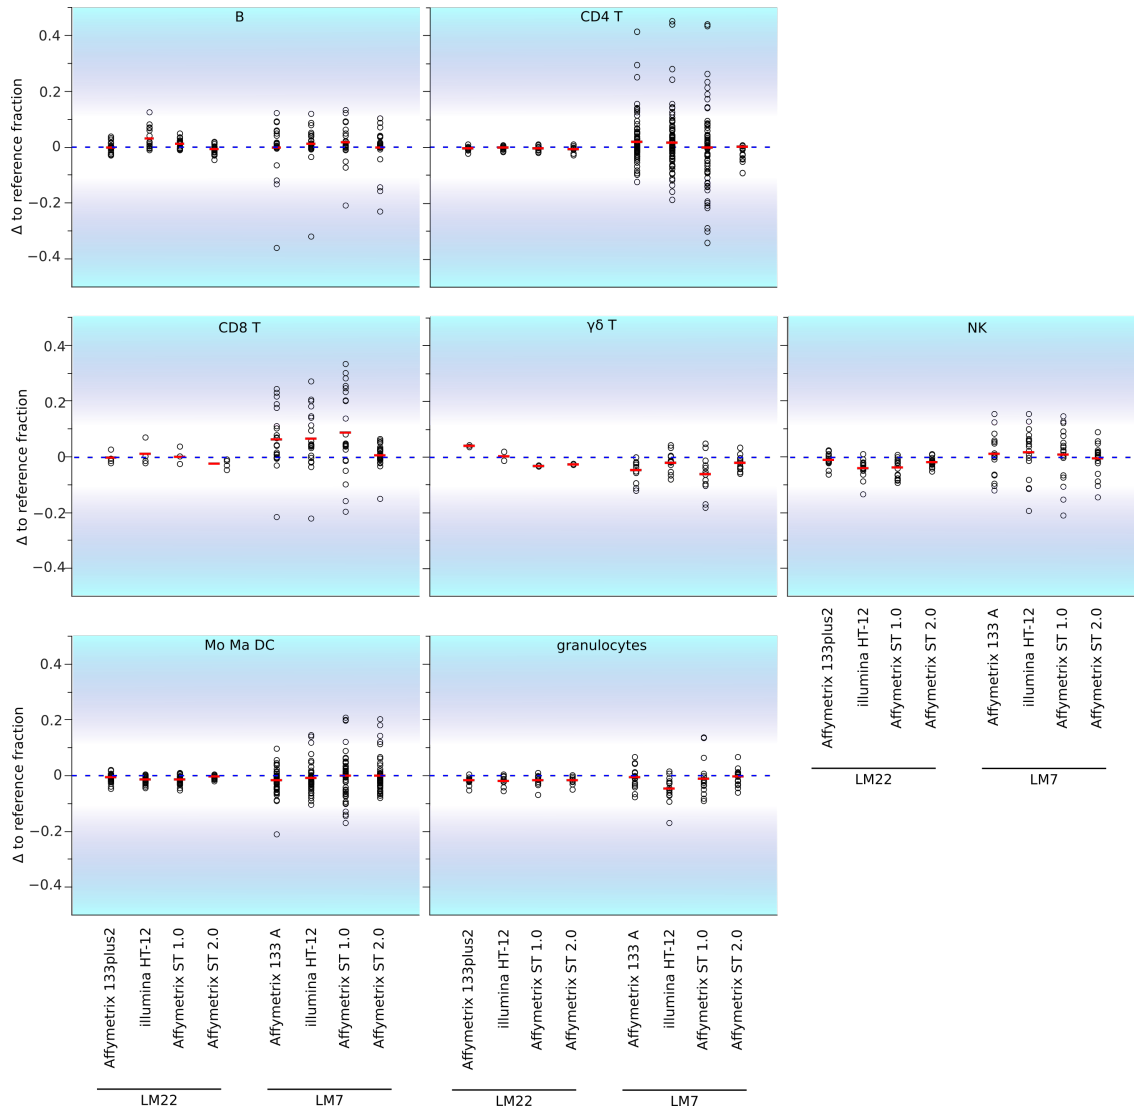

**Supplemental Figure 2: Deviation introduced by different microarray platforms**

Cell subsets were enumerated with CIBERSORT-LM7 and LM22 in all reference samples (Supplemental Table 1 for LM7, listed in<sup>1</sup> for LM22) and these reference rates were compared to those produced when removing the LM7 and LM22 genes missing from the other platforms. Shown are deviations from results with the learning platform (Affymetrix HGU-133A for LM22, Affymetrix HGU133Plus 2.0 for LM7) by the specified platform, for each LM7 cell subset. Red bar: group means. Note the figure does not reflect the platform quality but stability of its results across platforms.

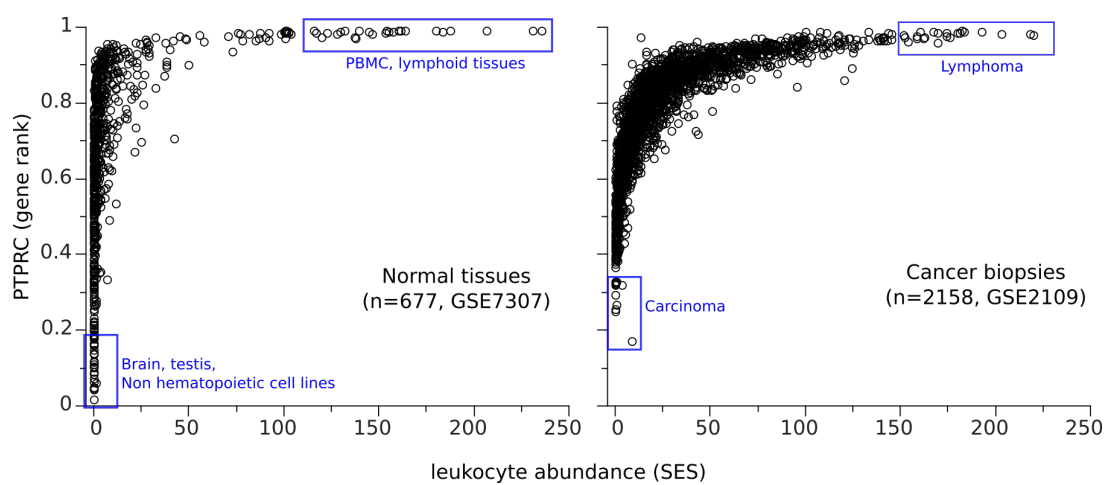

**Supplemental Figure 3: Metrics for leukocyte abundance in samples**

The CIBERSORT reference matrix LM7 was used to define 7 cell subset-specific gene sets by filtering out those LM7 genes which expression was  $<1000$  in the respective cell subset. This produced 7 gene sets: B; T CD4<sup>+</sup>; T CD8<sup>+</sup>; T  $\gamma\delta$ ; NK; Mo-Ma-DC Granulocytes. For each sample from the specified data sets, the sample enrichment scores (SES) of these 7 gene sets were computed as described elsewhere.<sup>2</sup> These 7 SES were adjusted to equivalent weights for each cell subset and summed. In parallel, each transcriptome from the specified data sets was rank-ordered (increasing order of expression level) and each gene rank was divided by the total number of ranks. CD45 is the leucocyte-defining marker expressed by all LM7 lineages, hence the rank of the CD45-encoding gene PTPRC was a surrogate gene marker of leukocyte abundance. Each sample from the specified dataset was analyzed for leukocyte abundance (based on SES) and for CD45 gene expression levels.

## **Supplemental Tables**

**CIBERSORT-LM7 fraction (%)**

|                   | B cells          | T CD4  | T CD8  | T $\gamma\delta$ | NK     | MoMaDC | granulocytes |        |
|-------------------|------------------|--------|--------|------------------|--------|--------|--------------|--------|
| Sample annotation | B cells          | 88,97% | 4,51%  | 0,56%            | 3,07%  | 0,69%  | 0,84%        | 1,37%  |
|                   | T CD4            | 0,85%  | 84,06% | 7,01%            | 2,74%  | 3,83%  | 0,54%        | 0,97%  |
|                   | T CD8            | 0,90%  | 13,56% | 77,22%           | 3,04%  | 3,36%  | 0,60%        | 1,32%  |
|                   | T $\gamma\delta$ | 0,49%  | 1,20%  | 2,73%            | 91,69% | 2,39%  | 1,19%        | 0,32%  |
|                   | NK               | 0,57%  | 3,00%  | 7,53%            | 4,59%  | 80,38% | 2,68%        | 1,25%  |
|                   | MoMaDC           | 5,31%  | 0,24%  | 1,32%            | 1,19%  | 0,55%  | 86,98%       | 4,41%  |
|                   | granulocytes     | 0,65%  | 0,70%  | 0,38%            | 1,50%  | 0,37%  | 8,72%        | 87,68% |

**CIBERSORT-LM22 fraction (%)**

|                   | B cells          | T CD4  | T CD8  | T $\gamma\delta$ | NK     | MoMaDC | granulocytes |        |
|-------------------|------------------|--------|--------|------------------|--------|--------|--------------|--------|
| Sample annotation | B cells          | 92,38% | 2,86%  | 1,08%            | 0,75%  | 1,04%  | 1,45%        | 0,44%  |
|                   | T CD4            | 1,25%  | 81,84% | 0,26%            | 8,23%  | 5,44%  | 1,14%        | 1,84%  |
|                   | T CD8            | 0,89%  | 32,51% | 46,10%           | 12,67% | 4,49%  | 1,32%        | 2,03%  |
|                   | T $\gamma\delta$ | 2,60%  | 31,10% | 2,53%            | 31,60% | 23,52% | 3,12%        | 5,53%  |
|                   | NK               | 1,44%  | 14,75% | 3,76%            | 4,66%  | 68,70% | 2,14%        | 4,55%  |
|                   | MoMaDC           | 4,42%  | 5,68%  | 0,37%            | 1,02%  | 2,04%  | 80,87%       | 5,59%  |
|                   | granulocytes     | 0,98%  | 3,72%  | 0,23%            | 0,93%  | 2,90%  | 2,98%        | 88,27% |

**Supplemental table 1: Comparison of LM7 and LM22 for leucocyte composition of reference samples**

The (n=265) reference samples used for CIBERSORT learning were analyzed by CIBERSORT-LM7 and CIBERSORT-LM22. Table shows their respective results for each lineage according to the sample annotation specified in each GSM file. The fractions were normalized to 100% of total leucocyte content. The rates of correct identifications of most lineages are significantly improved with CIBERSORT-LM7.

| GSE number | Number of samples | Cell type                                            | First author      | reference                     |
|------------|-------------------|------------------------------------------------------|-------------------|-------------------------------|
| GSE11430   | 10                | monocytes, macrophages                               | Maouche S         | 3                             |
| GSE12195   | 10                | B cells                                              | Compagno M        | 4                             |
| GSE13738   | 8                 | CD4 T cells                                          | Bangs SC          | 5                             |
| GSE14879   | 36                | NK, CD8, CD4 T cells                                 | Eckerle S         | 6                             |
| GSE22282   | 3                 | DC                                                   | Bosco MC          | 7                             |
| GSE27291   | 12                | $\gamma\delta$ T cells                               | Pont F            | 8                             |
| GSE28490   | 32                | DC, eosinophils, monocytes, neutrophils, CD8 T cells | Allantaz F        | 9                             |
| GSE28491   | 18                | eosinophils, monocytes, neutrophils, CD8 T cells     | Allantaz F        | 9                             |
| GSE28726   | 15                | CD4 T cells                                          | Constantinides MG | 10                            |
| GSE30536   | 11                | macrophages                                          | Sirois M          | 11                            |
| GSE42088   | 3                 | DC                                                   | Favila MA         | 12                            |
| GSE43769   | 12                | CD4 T cells                                          | Cousins DJ        |                               |
| GSE45535   | 4                 | B cells, monocytes                                   | Morehouse CA      |                               |
| GSE56314   | 12                | B cells                                              | Dybkr K           | 13                            |
| GSE56464   | 8                 | B cells                                              | Mei HE            | 14                            |
| GSE61697   | 24                | CD4 T cells                                          | Takeshita M       | 15                            |
| GSE65010   | 12                | CD4 T cells                                          | Walter GJ         | 16                            |
| GSE66384   | 7                 | CD4 T cells                                          | Amé-Thomas P      | 17                            |
| GSE71566   | 6                 | CD4 T cells                                          | Kanduri K         | 18                            |
| GSE72642   | 7                 | monocytes, NK, CD8 T cells                           | Du X              | 19                            |
| GSE8059    | 3                 | NK, CD8 T cells                                      | Dybkaer K         | 20                            |
| GSE83920   | 3                 | mast cells                                           | Leerkes M         |                               |
| NA         | 9                 | NK                                                   | Poupot M          | unpublished data from our lab |

**Supplemental table 2: List of reference studies**

| Gene     | B cells | T CD4   | T CD8   | T $\gamma\delta$ | NK      | MoMaDC  | granulocytes |
|----------|---------|---------|---------|------------------|---------|---------|--------------|
| ABCB1    | 212.07  | 37.14   | 64.54   | 516.28           | 190.63  | 27.32   | 19.20        |
| ABCB4    | 212.15  | 37.15   | 64.56   | 516.82           | 190.70  | 27.32   | 19.21        |
| ADRB2    | 107.31  | 26.83   | 129.07  | 614.81           | 975.45  | 73.89   | 75.59        |
| AIM2     | 725.77  | 126.46  | 35.17   | 105.86           | 39.67   | 77.17   | 20.27        |
| ALOX5    | 720.88  | 18.64   | 97.85   | 14.94            | 43.99   | 1828.00 | 3686.10      |
| ANKRD55  | 10.89   | 105.60  | 17.56   | 15.25            | 13.94   | 16.76   | 34.61        |
| ANPEP    | 15.88   | 14.65   | 15.43   | 12.05            | 18.80   | 429.67  | 419.37       |
| APOBEC3A | 9.09    | 10.49   | 11.82   | 10.79            | 15.53   | 449.15  | 440.20       |
| AQP9     | 18.78   | 17.86   | 24.33   | 23.48            | 29.13   | 671.83  | 875.33       |
| ARRDC4   | 17.10   | 19.54   | 25.35   | 16.09            | 51.28   | 347.85  | 254.19       |
| AYTL1    | 14.96   | 20.88   | 23.82   | 27.34            | 23.69   | 102.93  | 324.43       |
| B3GNT5   | 9.22    | 16.43   | 13.55   | 17.66            | 14.40   | 190.69  | 803.19       |
| BANK1    | 3060.15 | 26.23   | 25.01   | 36.09            | 32.74   | 46.49   | 36.16        |
| BCL11A   | 1439.09 | 38.74   | 61.85   | 43.51            | 51.98   | 165.30  | 173.86       |
| BCL11B   | 16.31   | 1398.82 | 1789.13 | 1336.53          | 650.40  | 24.67   | 52.69        |
| BCL2A1   | 398.71  | 136.47  | 138.36  | 88.46            | 215.86  | 1276.95 | 6703.52      |
| BCNP1    | 1146.03 | 29.02   | 50.98   | 28.22            | 25.80   | 29.83   | 53.87        |
| BCOR     | 247.07  | 135.08  | 199.00  | 758.20           | 178.57  | 67.94   | 56.17        |
| BLNK     | 436.36  | 15.17   | 30.19   | 15.06            | 20.03   | 27.12   | 20.38        |
| BPGM     | 65.21   | 70.04   | 28.74   | 372.19           | 353.71  | 73.99   | 44.75        |
| BRDG1    | 1049.45 | 40.13   | 16.68   | 19.19            | 159.65  | 19.97   | 49.67        |
| BTBD11   | 12.49   | 89.63   | 124.57  | 392.85           | 26.08   | 45.08   | 44.56        |
| BTBD5    | 220.48  | 167.44  | 74.41   | 1025.77          | 154.30  | 110.28  | 59.88        |
| BTK      | 1208.27 | 23.19   | 43.34   | 29.31            | 44.48   | 320.10  | 236.49       |
| C16ORF30 | 29.90   | 277.29  | 587.98  | 146.72           | 125.04  | 32.58   | 35.00        |
| C5AR1    | 8.27    | 9.98    | 9.20    | 8.23             | 13.34   | 324.93  | 476.22       |
| C5ORF29  | 740.73  | 7.40    | 8.33    | 7.77             | 9.02    | 199.50  | 338.20       |
| C6ORF105 | 16.04   | 219.24  | 21.29   | 10.94            | 13.21   | 16.02   | 14.22        |
| C6ORF190 | 14.52   | 195.76  | 214.06  | 189.44           | 23.89   | 13.50   | 52.86        |
| CACNA2D3 | 9.02    | 8.64    | 8.96    | 8.60             | 9.59    | 208.66  | 8.08         |
| CAMK4    | 23.86   | 111.90  | 60.75   | 44.69            | 21.23   | 19.28   | 27.85        |
| CAPG     | 390.67  | 93.02   | 69.40   | 48.54            | 115.91  | 1187.96 | 240.55       |
| CCDC64   | 80.93   | 323.39  | 395.60  | 145.44           | 128.85  | 47.19   | 56.49        |
| CCL4     | 65.42   | 54.61   | 708.83  | 2306.39          | 6074.61 | 92.97   | 2394.10      |
| CCL5     | 52.85   | 311.33  | 4397.70 | 4043.25          | 4397.70 | 116.11  | 95.79        |
| CCR3     | 21.05   | 23.13   | 28.08   | 24.41            | 25.60   | 21.72   | 877.58       |
| CCR5     | 110.81  | 153.11  | 411.77  | 3349.60          | 580.22  | 648.82  | 110.25       |
| CCR6     | 1142.65 | 24.75   | 26.64   | 31.47            | 17.60   | 9.44    | 8.58         |
| CCR7     | 251.43  | 765.02  | 1299.25 | 444.04           | 189.79  | 31.51   | 17.88        |
| CD14     | 22.53   | 19.65   | 16.01   | 17.09            | 20.46   | 2567.76 | 222.95       |
| CD160    | 16.25   | 14.72   | 187.37  | 83.31            | 414.27  | 14.17   | 11.11        |
| CD163    | 23.34   | 23.79   | 32.66   | 23.86            | 25.36   | 1094.75 | 56.80        |
| CD180    | 804.01  | 54.11   | 67.07   | 52.24            | 70.05   | 202.43  | 151.99       |
| CD19     | 762.42  | 12.77   | 16.58   | 13.60            | 14.66   | 18.54   | 12.91        |
| CD1C     | 1654.02 | 51.01   | 61.99   | 57.41            | 55.53   | 320.09  | 69.00        |
| CD2      | 24.14   | 2083.27 | 2029.52 | 1670.19          | 1567.94 | 41.54   | 25.24        |
| CD200    | 93.47   | 67.63   | 17.74   | 20.52            | 16.21   | 12.05   | 13.73        |
| CD22     | 1316.25 | 23.53   | 29.44   | 25.73            | 26.14   | 34.36   | 20.22        |
| CD226    | 24.12   | 151.76  | 23.73   | 126.56           | 370.23  | 15.30   | 10.32        |
| CD244    | 37.56   | 31.78   | 164.89  | 92.01            | 847.30  | 151.05  | 56.77        |
| CD247    | 36.71   | 870.48  | 1632.35 | 1906.60          | 2540.90 | 53.92   | 52.23        |
| CD28     | 9.42    | 665.68  | 386.24  | 200.79           | 12.91   | 11.76   | 10.33        |
| CD300A   | 136.60  | 51.44   | 344.61  | 519.86           | 2283.85 | 1153.54 | 1636.99      |
| CD300LF  | 12.78   | 15.25   | 20.11   | 21.78            | 31.65   | 985.88  | 748.99       |
| CD3D     | 104.30  | 3769.34 | 4327.44 | 2500.19          | 380.90  | 93.64   | 73.30        |
| CD3E     | 34.23   | 438.19  | 133.95  | 233.17           | 84.25   | 34.18   | 42.51        |
| CD3G     | 31.39   | 1085.63 | 1225.53 | 577.62           | 89.93   | 37.93   | 28.18        |
| CD40LG   | 45.71   | 277.66  | 63.68   | 71.50            | 53.55   | 44.75   | 98.34        |
| CD5      | 49.95   | 534.41  | 329.61  | 388.13           | 42.24   | 44.68   | 62.56        |
| CD6      | 184.55  | 1435.53 | 2341.06 | 2011.64          | 331.01  | 125.53  | 151.14       |
| CD69     | 948.70  | 1461.99 | 1149.83 | 2950.16          | 1392.53 | 17.36   | 540.07       |
| CD72     | 666.89  | 36.19   | 25.11   | 26.41            | 62.96   | 43.88   | 16.21        |
| CD79A    | 4206.50 | 73.16   | 96.00   | 98.43            | 65.70   | 83.49   | 127.19       |
| CD79B    | 1206.08 | 91.09   | 74.50   | 38.97            | 87.81   | 47.77   | 35.82        |
| CD8A     | 21.51   | 23.20   | 3810.17 | 216.22           | 561.28  | 31.41   | 23.20        |
| CD8B     | 38.48   | 52.25   | 1512.13 | 55.90            | 74.82   | 46.13   | 70.51        |

Continued on next page



– continued from previous page

| Gene     | B cells | T CD4   | T CD8   | T $\gamma\delta$ | NK      | MoMaDC  | granulocytes |
|----------|---------|---------|---------|------------------|---------|---------|--------------|
| CD93     | 13.67   | 19.01   | 24.09   | 25.35            | 94.70   | 2082.88 | 207.23       |
| CD96     | 65.83   | 401.97  | 784.37  | 272.69           | 808.16  | 20.12   | 26.32        |
| CDR2     | 47.27   | 549.95  | 591.81  | 361.37           | 137.80  | 105.41  | 30.61        |
| CHRM3    | 10.69   | 138.96  | 127.05  | 21.98            | 51.28   | 10.73   | 14.05        |
| CLC      | 22.43   | 16.28   | 29.03   | 15.29            | 35.03   | 23.77   | 718.28       |
| CLEC12A  | 11.57   | 10.15   | 14.36   | 10.69            | 22.53   | 339.54  | 599.31       |
| CLEC2D   | 575.83  | 857.36  | 361.77  | 263.14           | 325.39  | 56.62   | 39.84        |
| CLEC4A   | 76.32   | 37.19   | 32.21   | 62.70            | 33.65   | 1707.31 | 107.65       |
| CLEC7A   | 14.71   | 22.60   | 34.71   | 24.72            | 32.28   | 2620.69 | 605.89       |
| CLU1     | 130.32  | 9.96    | 10.71   | 8.89             | 9.33    | 8.94    | 9.15         |
| CMTM2    | 9.97    | 13.30   | 14.29   | 13.75            | 13.25   | 14.67   | 303.27       |
| CPNE5    | 1464.85 | 27.66   | 40.20   | 46.43            | 40.09   | 30.42   | 28.93        |
| CPNE8    | 12.52   | 28.70   | 12.12   | 22.20            | 31.89   | 310.91  | 11.47        |
| CPVL     | 14.85   | 12.30   | 17.60   | 35.71            | 16.06   | 2122.84 | 10.86        |
| CR1      | 740.58  | 32.90   | 42.00   | 26.26            | 29.04   | 43.09   | 248.23       |
| CR2      | 511.08  | 10.92   | 32.95   | 14.48            | 11.18   | 11.55   | 20.72        |
| CREM     | 83.28   | 214.57  | 144.63  | 4115.03          | 659.42  | 129.84  | 126.21       |
| CRTAM    | 9.81    | 23.63   | 907.39  | 94.90            | 461.92  | 171.21  | 10.28        |
| CSF2RB   | 411.22  | 65.01   | 49.75   | 80.52            | 177.18  | 1349.78 | 4327.44      |
| CST7     | 29.88   | 382.43  | 1844.11 | 1220.08          | 3210.07 | 60.31   | 669.86       |
| CTLA4    | 13.19   | 1117.57 | 63.89   | 102.76           | 14.34   | 11.35   | 10.26        |
| CTSW     | 64.02   | 146.84  | 358.48  | 743.72           | 4702.82 | 62.09   | 87.65        |
| CXCR3    | 84.85   | 139.08  | 298.66  | 1314.40          | 135.49  | 39.77   | 34.22        |
| CXCR6    | 43.76   | 162.29  | 368.84  | 1296.69          | 75.63   | 27.26   | 35.35        |
| CYBB     | 1093.45 | 24.44   | 31.00   | 30.29            | 38.88   | 2113.04 | 478.93       |
| DAPK1    | 28.45   | 22.26   | 58.46   | 43.68            | 138.02  | 1121.41 | 900.14       |
| DEFA1    | 27.39   | 21.69   | 64.45   | 15.36            | 569.07  | 38.51   | 918.26       |
| DEFA3    | 27.39   | 21.68   | 64.43   | 15.36            | 568.28  | 38.51   | 915.84       |
| DENND2D  | 530.01  | 877.81  | 2130.27 | 413.80           | 1207.26 | 210.75  | 49.42        |
| DMXL2    | 13.69   | 26.35   | 18.02   | 19.63            | 51.69   | 1494.51 | 549.67       |
| DOK3     | 1204.76 | 20.91   | 34.10   | 21.83            | 35.80   | 764.56  | 1170.69      |
| DSCR1L2  | 16.56   | 43.78   | 21.43   | 18.38            | 12.26   | 16.41   | 10.24        |
| EAF2     | 996.46  | 64.97   | 50.24   | 35.24            | 71.38   | 290.06  | 197.98       |
| EDG8     | 25.29   | 26.07   | 151.54  | 1306.74          | 1532.62 | 23.61   | 22.74        |
| ELOVL6   | 11.61   | 19.94   | 12.20   | 18.90            | 366.78  | 12.41   | 9.74         |
| EMILIN2  | 33.20   | 68.86   | 67.03   | 138.45           | 112.88  | 1578.29 | 62.02        |
| EMR2     | 10.50   | 11.73   | 13.22   | 11.28            | 15.59   | 285.80  | 1217.33      |
| EMR3     | 25.99   | 18.31   | 18.52   | 16.87            | 16.95   | 47.53   | 604.45       |
| ENPP5    | 6.29    | 5.86    | 8.00    | 6.40             | 92.45   | 5.99    | 5.69         |
| EOMES    | 18.47   | 69.97   | 1201.29 | 790.67           | 1869.33 | 28.16   | 25.58        |
| F13A1    | 20.34   | 22.49   | 41.05   | 42.32            | 30.86   | 996.80  | 69.25        |
| FAM125B  | 44.93   | 69.51   | 384.48  | 499.81           | 93.42   | 159.92  | 74.73        |
| FAM30A   | 578.51  | 45.94   | 63.40   | 35.15            | 54.96   | 45.13   | 73.66        |
| FAM46C   | 1104.98 | 664.63  | 316.51  | 5751.26          | 563.33  | 27.88   | 177.15       |
| FASLG    | 21.91   | 29.88   | 53.01   | 152.56           | 667.82  | 19.94   | 20.41        |
| FBP1     | 37.01   | 42.26   | 71.76   | 39.53            | 83.74   | 552.81  | 71.98        |
| FCER1G   | 29.32   | 37.70   | 102.39  | 53.17            | 2405.93 | 3421.76 | 1252.18      |
| FCGBP    | 39.70   | 60.81   | 361.14  | 146.22           | 133.81  | 34.75   | 34.49        |
| FCGR2A   | 55.75   | 15.37   | 18.76   | 17.06            | 36.98   | 822.90  | 1332.45      |
| FCGR2B   | 568.20  | 16.61   | 19.17   | 23.13            | 35.64   | 129.30  | 240.90       |
| FCGR3A   | 16.32   | 11.47   | 13.41   | 32.31            | 1827.14 | 87.63   | 187.67       |
| FCGR3B   | 16.33   | 11.47   | 13.42   | 32.32            | 1841.93 | 87.65   | 187.76       |
| FCN1     | 23.65   | 21.30   | 37.62   | 21.54            | 27.93   | 1707.31 | 127.35       |
| FCRL1    | 508.97  | 12.48   | 18.45   | 10.30            | 12.64   | 12.22   | 34.85        |
| FCRL2    | 712.80  | 27.17   | 57.38   | 22.51            | 31.05   | 26.62   | 313.56       |
| FCRL3    | 1034.58 | 80.07   | 1201.17 | 115.95           | 1763.79 | 37.36   | 53.32        |
| FCRL5    | 1284.81 | 53.35   | 90.76   | 52.11            | 54.41   | 52.51   | 99.73        |
| FCRLA    | 1174.39 | 30.30   | 36.52   | 51.11            | 37.46   | 57.58   | 39.17        |
| FFAR2    | 14.67   | 16.06   | 14.92   | 17.61            | 16.04   | 21.70   | 1056.95      |
| FGD4     | 19.59   | 10.22   | 11.73   | 11.20            | 15.73   | 334.05  | 325.40       |
| FGF7     | 8.04    | 9.50    | 10.32   | 9.16             | 9.25    | 9.00    | 308.67       |
| FGL2     | 84.17   | 41.57   | 26.18   | 26.84            | 132.34  | 2355.58 | 1209.10      |
| FGR      | 163.23  | 43.41   | 253.45  | 97.93            | 1327.95 | 2907.33 | 2186.79      |
| FLJ22662 | 25.02   | 22.45   | 32.20   | 24.70            | 21.71   | 3484.77 | 291.63       |
| FLJ22814 | 249.89  | 13.25   | 16.22   | 11.13            | 14.71   | 12.77   | 10.36        |

Continued on next page

– continued from previous page

| Gene         | B cells | T CD4   | T CD8   | T $\gamma\delta$ | NK      | MoMaDC  | granulocytes |
|--------------|---------|---------|---------|------------------|---------|---------|--------------|
| FLJ25967     | 417.31  | 420.38  | 522.79  | 2367.74          | 207.13  | 70.74   | 245.02       |
| FLJ42562     | 219.91  | 17.19   | 14.32   | 30.78            | 20.46   | 14.65   | 10.43        |
| FLJ44635     | 9.11    | 14.84   | 18.00   | 18.44            | 58.26   | 71.59   | 487.35       |
| FPR1         | 34.69   | 40.60   | 62.93   | 54.20            | 60.28   | 646.19  | 4761.88      |
| GALNAC4S-6ST | 650.91  | 18.44   | 17.96   | 20.74            | 27.59   | 1296.69 | 1537.10      |
| GCA          | 478.00  | 82.89   | 26.89   | 59.51            | 58.00   | 746.75  | 2499.17      |
| GGTA1        | 20.56   | 19.06   | 31.26   | 23.44            | 23.49   | 541.12  | 32.31        |
| GIMAP1       | 14.44   | 629.39  | 1217.01 | 551.16           | 498.77  | 171.09  | 7.29         |
| GIMAP6       | 15.86   | 626.71  | 1279.59 | 459.68           | 1856.69 | 125.14  | 27.37        |
| GIMAP7       | 9.53    | 1363.89 | 2092.95 | 692.48           | 1458.26 | 186.45  | 7.01         |
| GNG2         | 271.03  | 936.07  | 1346.76 | 4622.74          | 2969.15 | 791.71  | 1138.40      |
| GNLY         | 38.13   | 54.86   | 955.91  | 3521.14          | 9010.54 | 43.62   | 30.83        |
| GPR109B      | 11.32   | 15.36   | 16.15   | 12.63            | 33.34   | 60.25   | 371.34       |
| GPR132       | 82.33   | 66.09   | 64.04   | 467.80           | 62.36   | 57.99   | 120.68       |
| GPR171       | 11.44   | 571.33  | 1397.55 | 2370.45          | 710.73  | 19.26   | 44.77        |
| GPR97        | 42.55   | 36.12   | 50.40   | 47.64            | 100.77  | 38.78   | 716.13       |
| GZMA         | 16.29   | 239.75  | 1925.89 | 880.92           | 6074.61 | 21.50   | 11.41        |
| GZMB         | 18.00   | 29.47   | 1071.31 | 4764.47          | 7088.56 | 38.11   | 15.82        |
| GZMH         | 22.08   | 36.81   | 2588.25 | 710.44           | 2378.04 | 33.20   | 19.21        |
| GZMK         | 21.41   | 111.25  | 1936.64 | 1797.89          | 301.92  | 26.83   | 22.99        |
| HCK          | 88.94   | 26.29   | 22.53   | 27.35            | 45.93   | 1803.65 | 1811.00      |
| HIP1         | 23.60   | 21.47   | 23.22   | 25.59            | 69.63   | 81.78   | 332.78       |
| HLA-DMB      | 1337.29 | 61.73   | 202.73  | 126.55           | 265.98  | 1626.75 | 141.38       |
| HLA-DOB      | 2102.11 | 44.61   | 61.29   | 67.78            | 76.18   | 58.21   | 65.13        |
| HLA-DQA1     | 5914.52 | 35.30   | 108.02  | 86.27            | 330.61  | 2038.15 | 14.50        |
| HLA-DQA2     | 5636.81 | 35.30   | 107.99  | 86.25            | 330.41  | 2020.08 | 14.50        |
| HLA-DRB4     | 459.17  | 40.29   | 55.72   | 45.73            | 45.58   | 2511.40 | 60.49        |
| ICOS         | 25.16   | 741.28  | 183.59  | 390.37           | 62.85   | 21.86   | 22.96        |
| IFI30        | 2534.95 | 111.47  | 191.96  | 234.55           | 280.07  | 8219.82 | 2149.04      |
| IFNG         | 23.01   | 58.10   | 93.46   | 317.34           | 668.84  | 16.90   | 15.69        |
| IGHD         | 1163.73 | 43.18   | 50.99   | 36.87            | 46.30   | 41.32   | 80.54        |
| IGSF6        | 11.78   | 13.39   | 12.93   | 9.65             | 16.03   | 1611.53 | 198.50       |
| IL18RAP      | 27.29   | 117.83  | 265.79  | 2102.11          | 3157.17 | 36.93   | 773.46       |
| IL2RA        | 30.66   | 250.06  | 22.11   | 104.14           | 89.08   | 18.49   | 23.14        |
| IL2RB        | 93.23   | 1770.01 | 1769.51 | 2382.87          | 4155.82 | 55.33   | 119.14       |
| IL32         | 36.53   | 1369.03 | 207.55  | 291.98           | 1913.51 | 29.86   | 20.81        |
| IL7R         | 43.20   | 3014.31 | 2973.84 | 2970.72          | 325.39  | 103.17  | 77.57        |
| IL8RB        | 11.88   | 11.19   | 11.83   | 12.19            | 147.48  | 36.19   | 585.41       |
| ITGAM        | 59.54   | 61.86   | 191.34  | 670.15           | 1458.26 | 2259.00 | 1190.37      |
| ITGAX        | 39.46   | 32.15   | 32.28   | 32.75            | 128.34  | 472.94  | 963.59       |
| ITK          | 14.44   | 1984.40 | 1849.33 | 1331.07          | 1814.08 | 26.27   | 16.20        |
| KCNE3        | 17.74   | 20.57   | 37.76   | 21.10            | 31.35   | 1227.11 | 940.09       |
| KCNJ2        | 8.87    | 10.05   | 13.65   | 12.04            | 13.62   | 103.44  | 169.47       |
| KIAA0125     | 686.06  | 21.95   | 30.82   | 20.17            | 35.02   | 25.97   | 36.04        |
| KIAA0746     | 2977.44 | 400.43  | 290.72  | 537.63           | 349.16  | 406.08  | 41.39        |
| KIAA0748     | 149.81  | 421.68  | 154.67  | 93.00            | 168.88  | 37.58   | 31.25        |
| KIAA1212     | 39.66   | 28.89   | 23.96   | 12.12            | 19.01   | 864.48  | 36.11        |
| KIAA1324     | 32.99   | 133.03  | 64.18   | 60.32            | 43.79   | 26.53   | 89.73        |
| KIAA1913     | 22.04   | 33.52   | 16.46   | 180.56           | 39.43   | 10.98   | 9.46         |
| KIR2DL1      | 44.63   | 46.21   | 87.03   | 93.66            | 590.20  | 42.12   | 73.50        |
| KIR2DL2      | 37.57   | 31.43   | 62.13   | 98.56            | 620.09  | 32.18   | 45.04        |
| KIR2DL4      | 31.37   | 34.31   | 45.13   | 60.07            | 432.00  | 35.15   | 61.58        |
| KIR2DL5A     | 35.22   | 27.13   | 48.89   | 67.95            | 510.62  | 27.41   | 36.16        |
| KIR2DS2      | 14.04   | 12.09   | 27.68   | 61.68            | 539.73  | 10.68   | 13.98        |
| KIR2DS5      | 50.07   | 46.53   | 98.66   | 101.23           | 766.12  | 45.76   | 85.62        |
| KIR3DL1      | 29.11   | 28.68   | 43.48   | 135.14           | 678.38  | 24.29   | 22.47        |
| KIR3DL2      | 32.23   | 33.66   | 37.35   | 97.65            | 510.62  | 30.14   | 31.98        |
| KIR3DL3      | 27.99   | 25.40   | 39.79   | 71.00            | 506.16  | 26.54   | 39.80        |
| KIT          | 19.81   | 21.22   | 44.39   | 55.66            | 260.63  | 23.65   | 373.76       |
| KLRB1        | 24.11   | 354.78  | 1856.26 | 2590.73          | 2969.15 | 46.27   | 26.65        |
| KLRC1        | 9.27    | 8.90    | 108.84  | 2941.33          | 1814.08 | 9.12    | 14.32        |
| KLRC2        | 9.27    | 8.89    | 108.81  | 2898.76          | 1800.90 | 9.12    | 14.32        |
| KLRC3        | 7.35    | 7.62    | 54.36   | 102.02           | 758.59  | 8.43    | 8.61         |
| KLRC4        | 264.69  | 39.08   | 1223.75 | 565.08           | 1959.78 | 26.64   | 47.26        |
| KLRD1        | 22.16   | 26.94   | 409.83  | 518.18           | 2481.89 | 26.19   | 27.72        |

Continued on next page

– continued from previous page

| Gene        | B cells | T CD4   | T CD8   | T $\gamma\delta$ | NK      | MoMaDC  | granulocytes |
|-------------|---------|---------|---------|------------------|---------|---------|--------------|
| KLRF1       | 13.88   | 14.69   | 61.28   | 138.26           | 2775.54 | 30.57   | 11.82        |
| KLRK1       | 80.44   | 46.04   | 2931.04 | 1775.10          | 3673.52 | 51.82   | 60.57        |
| KMO         | 390.29  | 14.79   | 23.22   | 18.40            | 21.19   | 254.11  | 39.16        |
| KSP37       | 15.52   | 20.18   | 827.94  | 1203.46          | 2432.84 | 19.47   | 11.22        |
| LAT         | 92.69   | 2167.56 | 1731.45 | 1545.47          | 730.06  | 140.90  | 46.58        |
| LCK         | 174.21  | 3060.72 | 3851.44 | 1809.37          | 2083.27 | 32.95   | 34.72        |
| LEF1        | 18.48   | 1249.05 | 1904.68 | 155.33           | 150.88  | 38.44   | 171.47       |
| LENG10      | 9.85    | 125.61  | 151.09  | 712.23           | 76.46   | 21.50   | 60.62        |
| LEPREL1     | 31.36   | 47.33   | 56.34   | 922.39           | 48.14   | 66.85   | 67.68        |
| LOC144571   | 13.09   | 29.75   | 270.02  | 147.54           | 167.20  | 24.92   | 28.71        |
| LOC202134   | 19.74   | 50.14   | 379.81  | 23.11            | 20.62   | 23.46   | 26.00        |
| LOC283027   | 8.69    | 8.58    | 10.76   | 8.81             | 10.47   | 9.44    | 635.97       |
| LOC284262   | 351.34  | 14.73   | 34.52   | 72.77            | 191.87  | 35.85   | 16.34        |
| LOC285382   | 7.35    | 7.24    | 7.92    | 7.06             | 7.58    | 8.27    | 120.20       |
| LOC339562   | 738.59  | 68.55   | 139.92  | 77.22            | 70.97   | 77.94   | 231.90       |
| LOC360030   | 7.09    | 21.45   | 9.04    | 94.91            | 7.34    | 11.74   | 11.95        |
| LOC391427   | 789.16  | 34.18   | 58.17   | 33.57            | 46.80   | 39.73   | 95.65        |
| LOC400509   | 115.49  | 11.01   | 9.75    | 18.10            | 15.57   | 12.41   | 8.05         |
| LOC401131   | 10.63   | 11.78   | 16.37   | 13.49            | 13.20   | 13.51   | 297.18       |
| LOC439949   | 30.80   | 1012.09 | 894.57  | 290.16           | 909.69  | 24.18   | 22.72        |
| LOC440607   | 14.02   | 15.51   | 17.02   | 13.30            | 19.03   | 615.67  | 145.97       |
| LOC642083   | 13.04   | 186.58  | 2496.90 | 5323.30          | 2329.29 | 27.83   | 34.61        |
| LOC642103   | 12.25   | 10.18   | 11.31   | 8.89             | 37.23   | 16.80   | 756.22       |
| LOC643675   | 31.93   | 56.78   | 2006.72 | 36.07            | 82.65   | 58.08   | 767.68       |
| LOC643930   | 96.42   | 49.09   | 158.70  | 1860.11          | 2103.82 | 338.57  | 777.27       |
| LOC645022   | 77.77   | 112.54  | 359.66  | 312.36           | 39.63   | 27.57   | 22.12        |
| LOC647134   | 417.88  | 48.40   | 67.86   | 44.21            | 62.43   | 52.87   | 63.06        |
| LOC647353   | 1855.63 | 5131.25 | 4197.05 | 1601.81          | 2887.52 | 41.48   | 11.03        |
| LOC647460   | 107.49  | 13.24   | 15.61   | 11.71            | 15.14   | 12.67   | 11.85        |
| LOC649805   | 163.68  | 22.88   | 25.38   | 17.94            | 24.69   | 18.71   | 16.76        |
| LOC650946   | 6222.95 | 35.36   | 108.05  | 86.29            | 330.81  | 2056.15 | 14.54        |
| LOC652106   | 418.20  | 48.42   | 67.88   | 44.22            | 62.44   | 52.89   | 63.08        |
| LOC652494   | 693.11  | 76.04   | 128.10  | 50.74            | 71.23   | 70.58   | 167.18       |
| LOC652651   | 692.02  | 76.02   | 128.06  | 50.73            | 71.21   | 70.57   | 167.12       |
| LOC652745   | 715.39  | 24.00   | 28.50   | 21.23            | 23.85   | 24.94   | 34.06        |
| LOC652758   | 14.02   | 15.51   | 17.02   | 13.30            | 19.04   | 616.58  | 146.02       |
| LOC653117   | 12.21   | 17.55   | 33.39   | 13.68            | 14.50   | 15.88   | 904.59       |
| LOC653506   | 44.43   | 55.22   | 91.06   | 1216.86          | 281.87  | 351.77  | 560.37       |
| LOC653600   | 27.38   | 21.68   | 64.42   | 15.35            | 567.59  | 38.50   | 913.60       |
| LOC653725   | 110.78  | 153.06  | 411.42  | 3289.81          | 579.51  | 647.88  | 110.22       |
| LOC653757   | 31.36   | 34.31   | 45.12   | 60.05            | 431.66  | 35.15   | 61.55        |
| LOC90925    | 1385.84 | 24.92   | 22.69   | 20.94            | 27.40   | 22.01   | 22.21        |
| LPAAT-THETA | 13.59   | 44.47   | 26.81   | 163.85           | 22.50   | 642.62  | 357.10       |
| LRRK2       | 152.33  | 10.18   | 11.98   | 9.67             | 11.93   | 306.86  | 232.53       |
| LRRN3       | 18.84   | 75.83   | 159.74  | 34.40            | 26.72   | 18.60   | 16.99        |
| LY86        | 1195.48 | 37.26   | 64.89   | 53.41            | 49.45   | 1885.94 | 85.14        |
| LY9         | 341.84  | 309.87  | 965.53  | 218.83           | 135.24  | 111.68  | 48.00        |
| LY96        | 572.15  | 93.54   | 23.18   | 10.05            | 16.39   | 1188.35 | 1340.33      |
| MAG         | 1115.37 | 35.00   | 51.74   | 38.40            | 44.57   | 49.92   | 73.29        |
| MANSC1      | 11.10   | 10.79   | 9.17    | 7.25             | 7.74    | 20.68   | 291.35       |
| MARCH1      | 172.25  | 7.96    | 9.07    | 8.33             | 8.26    | 345.17  | 61.73        |
| MEFV        | 14.99   | 27.80   | 25.41   | 21.60            | 17.88   | 34.72   | 689.77       |
| METRNL      | 44.44   | 55.24   | 91.09   | 1221.95          | 282.00  | 351.99  | 560.98       |
| MGAM        | 12.25   | 10.18   | 11.30   | 8.89             | 37.23   | 16.80   | 754.75       |
| MGC24103    | 9.12    | 9.00    | 19.73   | 9.84             | 131.64  | 9.86    | 17.04        |
| MGC61571    | 100.45  | 143.99  | 434.38  | 173.76           | 1303.06 | 189.78  | 9.81         |
| MNDA        | 92.31   | 11.06   | 17.98   | 12.52            | 15.95   | 3132.15 | 2294.15      |
| MPEG1       | 1008.43 | 14.28   | 15.26   | 20.08            | 26.04   | 3851.44 | 188.22       |
| MS4A1       | 5796.90 | 19.12   | 32.78   | 21.06            | 27.03   | 21.02   | 40.73        |
| MS4A6A      | 67.23   | 31.09   | 38.20   | 51.86            | 35.28   | 1952.48 | 210.45       |
| MS4A7       | 283.94  | 25.81   | 28.61   | 39.26            | 46.37   | 590.17  | 42.68        |
| MTAC2D1     | 21.03   | 412.27  | 290.20  | 579.26           | 77.52   | 16.08   | 18.13        |
| MXD1        | 101.89  | 128.64  | 104.32  | 326.27           | 250.98  | 473.18  | 3293.00      |
| MYBL1       | 12.84   | 67.57   | 438.57  | 309.81           | 3210.07 | 14.36   | 14.83        |
| NAPSB       | 654.45  | 19.72   | 21.80   | 32.42            | 19.16   | 667.29  | 14.60        |

Continued on next page

– continued from previous page

| Gene     | B cells | T CD4   | T CD8   | T $\gamma\delta$ | NK      | MoMaDC  | granulocytes |
|----------|---------|---------|---------|------------------|---------|---------|--------------|
| NCF1     | 618.29  | 57.47   | 61.04   | 40.25            | 46.49   | 628.89  | 2027.10      |
| NCF2     | 63.11   | 36.59   | 29.60   | 13.23            | 40.17   | 3322.76 | 4542.67      |
| NDFIP2   | 18.46   | 149.30  | 42.95   | 465.47           | 403.11  | 10.77   | 93.26        |
| NKG7     | 36.32   | 63.59   | 1478.18 | 2606.00          | 5519.19 | 79.84   | 29.03        |
| NOD3     | 481.56  | 868.46  | 1576.16 | 1511.26          | 1751.13 | 23.70   | 22.07        |
| NPL      | 19.97   | 33.05   | 40.36   | 52.35            | 49.94   | 548.01  | 421.18       |
| NR4A3    | 36.33   | 33.17   | 28.77   | 1132.07          | 68.18   | 66.13   | 88.99        |
| OASL     | 40.89   | 64.85   | 116.44  | 565.54           | 255.07  | 81.70   | 247.47       |
| P2RY13   | 10.91   | 10.22   | 12.21   | 9.90             | 12.22   | 122.56  | 393.99       |
| P2RY14   | 15.36   | 19.23   | 15.38   | 94.83            | 42.38   | 24.00   | 523.59       |
| PACAP    | 339.04  | 49.95   | 75.53   | 43.09            | 72.97   | 45.15   | 58.04        |
| PADI4    | 10.91   | 13.36   | 38.96   | 13.75            | 14.37   | 37.38   | 692.14       |
| PASK     | 131.65  | 349.83  | 1119.41 | 155.52           | 80.75   | 44.43   | 56.72        |
| PBX4     | 45.06   | 298.30  | 232.81  | 501.13           | 75.42   | 28.16   | 20.50        |
| PCSK5    | 16.21   | 78.22   | 448.43  | 17.02            | 198.98  | 161.63  | 36.10        |
| PDE4B    | 871.34  | 618.29  | 618.81  | 3231.54          | 295.90  | 233.78  | 1029.84      |
| PDE4D    | 51.02   | 488.27  | 326.19  | 1126.19          | 564.79  | 43.65   | 169.85       |
| PDGFD    | 36.34   | 16.95   | 101.45  | 110.03           | 410.37  | 17.30   | 29.59        |
| PGAP1    | 11.00   | 124.01  | 72.19   | 287.27           | 44.61   | 24.30   | 37.51        |
| PLA2G7   | 8.25    | 8.66    | 9.05    | 8.24             | 10.30   | 183.62  | 8.08         |
| PLAUR    | 46.41   | 42.72   | 46.03   | 74.44            | 54.45   | 600.25  | 1253.57      |
| PLCG2    | 2354.68 | 42.47   | 183.87  | 144.54           | 687.01  | 613.49  | 591.31       |
| PLCXD2   | 42.12   | 98.87   | 168.14  | 423.88           | 249.32  | 13.25   | 12.17        |
| PLEKHK1  | 5.94    | 23.92   | 7.34    | 46.29            | 7.13    | 6.11    | 5.85         |
| PLXDC2   | 10.96   | 10.11   | 10.76   | 9.32             | 22.16   | 321.22  | 81.46        |
| PNOC     | 472.02  | 20.64   | 21.38   | 17.85            | 23.23   | 29.05   | 17.18        |
| POU2AF1  | 5115.30 | 164.40  | 88.42   | 11.83            | 22.39   | 18.52   | 18.04        |
| PRF1     | 47.41   | 517.35  | 2542.05 | 7146.19          | 9010.54 | 85.24   | 92.48        |
| PRKCH    | 33.03   | 2588.25 | 2948.14 | 3108.66          | 3014.31 | 154.99  | 75.33        |
| PRKCQ    | 18.95   | 538.09  | 473.93  | 679.22           | 984.36  | 33.72   | 42.16        |
| PRKX     | 338.05  | 527.97  | 461.64  | 2378.04          | 830.36  | 340.18  | 184.85       |
| PRKY     | 338.25  | 528.54  | 462.10  | 2405.93          | 832.10  | 340.38  | 184.91       |
| PRO1268  | 47.13   | 50.52   | 48.46   | 39.07            | 34.55   | 48.07   | 1369.92      |
| PROK2    | 7.39    | 9.69    | 11.76   | 23.00            | 8.53    | 11.70   | 256.77       |
| PRSS33   | 41.21   | 35.63   | 38.39   | 44.43            | 37.76   | 43.74   | 203.04       |
| PTGDR    | 13.29   | 14.05   | 41.26   | 17.78            | 331.21  | 13.40   | 59.06        |
| PTGS2    | 10.49   | 10.53   | 9.28    | 10.33            | 13.94   | 49.45   | 1217.23      |
| PYGL     | 14.75   | 13.43   | 16.29   | 12.68            | 20.69   | 248.17  | 632.97       |
| PYHIN1   | 18.31   | 192.19  | 261.25  | 225.73           | 1138.35 | 18.25   | 10.02        |
| QPCT     | 77.49   | 13.11   | 13.15   | 71.23            | 14.49   | 524.43  | 238.06       |
| RAB27B   | 16.47   | 28.55   | 34.75   | 106.07           | 476.48  | 30.40   | 22.11        |
| RAB30    | 788.45  | 85.04   | 53.48   | 134.95           | 49.79   | 40.36   | 87.92        |
| RALGPS2  | 1701.79 | 36.00   | 69.64   | 58.76            | 44.34   | 86.12   | 300.83       |
| RASGEF1A | 11.31   | 28.63   | 163.88  | 49.36            | 160.74  | 53.24   | 39.05        |
| RASGRP1  | 393.64  | 1663.83 | 1595.32 | 1350.94          | 1577.93 | 62.27   | 25.05        |
| RASGRP3  | 327.37  | 27.24   | 17.23   | 60.98            | 21.29   | 27.03   | 12.25        |
| RGS13    | 64.35   | 7.06    | 7.15    | 9.71             | 7.74    | 6.67    | 6.37         |
| RGS18    | 7.09    | 9.86    | 13.22   | 13.33            | 25.46   | 475.12  | 1092.06      |
| RNASE6   | 1121.34 | 23.47   | 23.90   | 17.85            | 36.03   | 2445.14 | 327.09       |
| RORA     | 26.63   | 489.00  | 669.37  | 2624.65          | 468.89  | 29.67   | 26.12        |
| SI00A12  | 10.45   | 11.51   | 19.76   | 10.91            | 11.59   | 153.83  | 469.27       |
| SAMD3    | 18.99   | 121.52  | 355.44  | 331.76           | 1800.90 | 16.69   | 16.57        |
| SART2    | 170.38  | 18.60   | 20.57   | 82.84            | 26.88   | 690.95  | 123.69       |
| SCML4    | 41.41   | 114.73  | 514.49  | 120.70           | 78.57   | 22.30   | 21.99        |
| SH2D1B   | 12.63   | 14.97   | 21.90   | 49.73            | 2604.32 | 21.43   | 36.95        |
| SIGLEC10 | 600.98  | 64.16   | 88.39   | 35.15            | 53.32   | 582.59  | 1350.89      |
| SIRPG    | 20.78   | 287.61  | 289.99  | 28.46            | 18.54   | 17.46   | 16.02        |
| SKAP1    | 109.08  | 606.00  | 530.15  | 222.36           | 701.97  | 35.23   | 35.98        |
| SLAMF1   | 550.77  | 301.77  | 103.18  | 263.12           | 21.21   | 20.57   | 18.22        |
| SLAMF7   | 253.12  | 21.01   | 347.49  | 647.91           | 2237.20 | 886.00  | 24.67        |
| SLC15A2  | 439.83  | 24.87   | 19.70   | 19.71            | 23.73   | 60.61   | 30.02        |
| SLC7A7   | 183.85  | 38.11   | 45.66   | 30.20            | 56.04   | 2703.18 | 98.66        |
| SLCO4C1  | 12.04   | 15.36   | 14.63   | 48.14            | 426.22  | 33.69   | 110.87       |
| SOCS1    | 111.11  | 114.86  | 97.73   | 758.80           | 206.88  | 27.46   | 45.64        |
| SPIB     | 265.50  | 29.75   | 43.31   | 37.35            | 38.66   | 37.41   | 36.81        |

Continued on next page

– continued from previous page

| Gene            | B cells | T CD4   | T CD8   | T $\gamma\delta$ | NK      | MoMaDC  | granulocytes |
|-----------------|---------|---------|---------|------------------|---------|---------|--------------|
| SPINLW1         | 10.03   | 10.28   | 10.49   | 8.59             | 9.22    | 8.75    | 267.75       |
| ST3GAL6         | 13.38   | 8.94    | 8.94    | 9.03             | 9.02    | 166.10  | 166.11       |
| STAT4           | 39.56   | 558.90  | 1102.95 | 1721.77          | 1856.69 | 74.47   | 58.45        |
| STYK1           | 7.44    | 8.34    | 23.01   | 46.52            | 97.96   | 7.70    | 7.73         |
| SYK             | 1263.83 | 35.67   | 68.61   | 42.59            | 502.43  | 1993.03 | 697.56       |
| SYTL2           | 18.68   | 142.53  | 564.72  | 1117.84          | 869.19  | 39.61   | 114.95       |
| SYTL3           | 73.28   | 335.97  | 442.08  | 1776.01          | 679.48  | 216.47  | 244.23       |
| TARP            | 13.04   | 186.52  | 2469.67 | 5131.25          | 2306.52 | 27.83   | 34.60        |
| TBC1D4          | 18.39   | 662.57  | 510.91  | 35.77            | 32.93   | 174.37  | 46.02        |
| TBC1D8          | 30.81   | 36.03   | 30.10   | 38.78            | 43.53   | 555.81  | 91.97        |
| TCL1A           | 413.03  | 31.45   | 27.36   | 37.74            | 33.29   | 37.86   | 23.49        |
| TFEC            | 11.03   | 6.13    | 7.25    | 9.44             | 8.67    | 414.01  | 8.14         |
| TLR10           | 215.83  | 14.86   | 21.47   | 15.51            | 16.01   | 27.12   | 40.08        |
| TLR8            | 10.82   | 9.89    | 9.56    | 8.74             | 13.78   | 1039.76 | 203.20       |
| TM6SF1          | 11.30   | 17.36   | 16.13   | 35.38            | 399.18  | 356.29  | 494.32       |
| TMEM154         | 491.02  | 186.97  | 146.41  | 125.53           | 71.81   | 646.27  | 3135.11      |
| TNFAIP2         | 32.84   | 27.68   | 43.49   | 32.63            | 54.03   | 495.27  | 938.69       |
| TNFRSF17        | 395.81  | 10.52   | 11.14   | 10.71            | 10.94   | 11.29   | 9.68         |
| TNFSF12-TNFSF13 | 85.59   | 46.45   | 70.62   | 41.03            | 69.68   | 1183.32 | 168.74       |
| TNFSF13         | 85.56   | 46.44   | 70.61   | 41.02            | 69.67   | 1178.65 | 168.61       |
| TNFSF13B        | 51.93   | 79.06   | 83.67   | 27.90            | 177.00  | 2356.22 | 543.97       |
| TRA@            | 501.10  | 2149.04 | 1000.88 | 224.92           | 202.86  | 96.14   | 137.21       |
| TRAC            | 337.54  | 2381.98 | 2317.90 | 586.75           | 322.34  | 48.09   | 30.17        |
| TRAT1           | 9.99    | 833.96  | 268.75  | 278.16           | 21.05   | 11.96   | 11.31        |
| TRAV20          | 515.87  | 3484.77 | 1095.28 | 189.23           | 163.58  | 88.17   | 103.23       |
| TRBC1           | 546.61  | 5227.27 | 5131.25 | 2415.60          | 3263.25 | 68.57   | 48.56        |
| TRBV19          | 545.97  | 5019.27 | 4907.29 | 2389.05          | 3210.07 | 68.55   | 48.55        |
| TRBV21-1        | 1883.48 | 5519.19 | 4475.27 | 1621.90          | 2969.15 | 41.50   | 11.04        |
| TRBV3-1         | 1870.36 | 5323.30 | 4324.82 | 1611.40          | 2927.13 | 41.49   | 11.03        |
| TRBV5-4         | 1898.76 | 5754.42 | 4643.54 | 1631.57          | 3014.31 | 41.51   | 11.04        |
| TRD@            | 26.59   | 55.53   | 143.02  | 7146.19          | 6371.28 | 30.51   | 18.69        |
| TRDV2           | 515.27  | 3414.55 | 1091.46 | 189.15           | 163.52  | 88.15   | 103.20       |
| TRGC2           | 13.05   | 186.64  | 2526.41 | 5519.19          | 2354.68 | 27.84   | 34.61        |
| TRGV2           | 13.05   | 186.80  | 2588.25 | 6074.61          | 2405.93 | 27.85   | 34.63        |
| TRGV9           | 13.05   | 186.74  | 2556.55 | 5754.42          | 2378.04 | 27.84   | 34.62        |
| TSHZ2           | 33.03   | 100.56  | 18.84   | 15.88            | 15.11   | 15.27   | 16.75        |
| TXK             | 13.54   | 158.68  | 174.99  | 109.69           | 875.53  | 13.53   | 16.46        |
| TYROBP          | 52.39   | 35.57   | 96.81   | 145.31           | 2604.32 | 5421.25 | 5323.30      |
| UBASH3A         | 29.70   | 316.56  | 511.62  | 160.25           | 38.58   | 17.19   | 13.80        |
| UPP1            | 40.71   | 306.72  | 277.36  | 1637.88          | 449.54  | 478.81  | 354.95       |
| USP6NL          | 230.42  | 17.89   | 15.72   | 13.12            | 19.21   | 63.82   | 14.18        |
| VPREB3          | 216.88  | 21.97   | 24.96   | 21.26            | 23.63   | 22.50   | 19.36        |
| XCL1            | 31.51   | 28.28   | 203.87  | 109.50           | 6074.61 | 16.68   | 15.42        |
| XCL2            | 35.22   | 32.83   | 336.66  | 175.12           | 6371.28 | 24.38   | 26.84        |
| ZAP70           | 37.63   | 481.05  | 775.80  | 179.54           | 613.07  | 26.00   | 15.87        |
| ZC3H12D         | 589.58  | 753.96  | 232.69  | 69.83            | 33.48   | 113.01  | 9.54         |
| ZNF101          | 158.06  | 523.65  | 504.85  | 151.24           | 139.99  | 66.40   | 22.85        |
| ZNF528          | 34.01   | 38.65   | 29.42   | 25.07            | 27.94   | 46.12   | 904.49       |
| ZNF595          | 30.56   | 18.25   | 27.04   | 10.54            | 25.34   | 24.57   | 862.71       |

**Supplemental table 3: LM7 matrix.** Genes specifically expressed (i.e.  $\log_2(\text{expression}) > 9$ ) by a specific subtype are colored as follows:

B cells, CD4, CD8,  $\gamma\delta$ , NK, MoMaDC and granulocytes.

| GSE number  | Number of samples | Cell type                                                | First author | reference |
|-------------|-------------------|----------------------------------------------------------|--------------|-----------|
| GSE11103    | 41                | monocytes, B cells                                       | Abbas AR     | 21        |
| GSE13906    | 4                 | $\gamma\delta$ T cells                                   | Zhang Y      | 22        |
| GSE15743    | 4                 | NK                                                       | Stegmann KA  | 23        |
| GSE16020    | 20                | granulocytes                                             | Vinh DC      | 24        |
| GSE20300    | 24                | monocytes, eosinophils, neutrophils                      | Shen-Orr SS  | 25        |
| GSE49877    | 36                | CD4, CD8 T cells                                         | Raine T      | 26        |
| GSE53166    | 113               | DC                                                       | Lee MN       | 27        |
| GSE65133    | 20                | B cells, CD4, CD8, $\gamma\delta$ T cells, NK, monocytes | Newman AM    | 28        |
| GSE65134    | 7                 | CD4 T cells                                              | Newman AM    | 28        |
| GSE65135    | 28                | B cells, CD4, CD8 T cells                                | Newman AM    | 28        |
| GSE6740     | 40                | CD4, CD8 T cells                                         | Hyrca MD     | 29        |
| GSE7307     | 677               | normal (non cancer) tissues                              | Roth R       |           |
| E-MEXP-2055 | 6                 | fetal $\gamma\delta$ T cells                             | Vermijlen D  | 30        |

**Supplemental table 4: List of validation studies**

| <b>cancer</b>            | <b>B cells</b> | <b>T CD4</b> | <b>T CD8</b> | <b>T <math>\gamma\delta</math></b> | <b>NK</b> | <b>MoMaDC</b> | <b>granulocytes</b> |
|--------------------------|----------------|--------------|--------------|------------------------------------|-----------|---------------|---------------------|
| B-ALL                    | 32.88          | 4.42         | 17.40        | 9.16                               | 3.14      | 17.32         | 17.54               |
| BL                       | 62.67          | 7.76         | 10.44        | 0.38                               | 2.02      | 11.67         | 1.92                |
| CLL                      | 95.07          | 14.11        | 10.73        | 3.44                               | 4.55      | 14.23         | 10.87               |
| DLBCL                    | 76.12          | 11.69        | 15.21        | 0.94                               | 4.67      | 29.77         | 2.73                |
| FL                       | 92.40          | 32.81        | 12.88        | 0.22                               | 2.30      | 9.75          | 1.52                |
| MCL                      | 115.21         | 10.01        | 9.07         | 1.29                               | 0.88      | 6.56          | 2.30                |
| SMZL                     | 128.39         | 16.86        | 9.60         | 0.13                               | 1.95      | 6.16          | 1.90                |
| THRBL                    | 29.41          | 48.12        | 26.97        | 0.14                               | 14.10     | 45.91         | 3.20                |
| T-ALL                    | 4.33           | 58.32        | 17.66        | 6.45                               | 2.29      | 11.98         | 11.41               |
| ALCL                     | 27.30          | 27.09        | 15.26        | 2.89                               | 6.61      | 35.00         | 2.17                |
| AITL                     | 36.65          | 62.17        | 17.97        | 0.81                               | 5.40      | 22.48         | 2.27                |
| PTCL-NOS                 | 31.06          | 50.35        | 20.61        | 2.36                               | 10.29     | 32.08         | 1.25                |
| PTCL NK                  | 19.19          | 21.95        | 9.88         | 1.22                               | 43.27     | 30.32         | 4.96                |
| CML                      | 1.26           | 1.16         | 11.00        | 13.83                              | 2.11      | 36.86         | 56.59               |
| Lung Squamous Cell       | 25.80          | 10.29        | 7.84         | 2.83                               | 1.32      | 46.13         | 4.16                |
| Lung Non Small Cell      | 28.73          | 9.24         | 6.35         | 3.59                               | 0.95      | 45.38         | 0.78                |
| Lung Adenocarcinoma      | 18.27          | 8.93         | 5.39         | 2.47                               | 0.61      | 42.17         | 0.80                |
| Pancreas                 | 15.18          | 12.34        | 4.39         | 2.35                               | 0.52      | 45.56         | 2.49                |
| Prostate                 | 5.99           | 6.40         | 5.84         | 9.58                               | 0.34      | 17.19         | 1.65                |
| Breast Inflammatory      | 17.23          | 12.68        | 6.82         | 2.49                               | 0.92      | 32.35         | 0.05                |
| Breast Ductal            | 10.56          | 8.53         | 5.90         | 1.80                               | 0.54      | 33.94         | 0.31                |
| Breast Lobular Carcinoma | 7.04           | 7.45         | 6.93         | 1.91                               | 0.41      | 33.67         | 0.39                |
| Stomach                  | 10.71          | 9.51         | 5.78         | 1.42                               | 1.56      | 30.13         | 0.52                |
| Kidney Pap & Cc          | 5.92           | 5.23         | 6.92         | 1.19                               | 0.79      | 37.21         | 0.59                |
| Colorectal               | 10.94          | 8.00         | 3.17         | 2.17                               | 0.32      | 30.08         | 3.59                |
| Bladder                  | 7.51           | 7.45         | 4.24         | 1.88                               | 0.93      | 28.95         | 3.23                |
| Liver                    | 6.30           | 7.26         | 3.57         | 1.49                               | 0.52      | 32.83         | 1.18                |
| Esophagus                | 12.92          | 4.21         | 2.94         | 5.90                               | 0.07      | 21.64         | 3.18                |
| Uterus                   | 8.81           | 7.35         | 3.97         | 1.68                               | 0.86      | 24.24         | 2.88                |
| Thyroid                  | 10.30          | 5.87         | 3.88         | 1.86                               | 0.20      | 25.56         | 0.39                |
| Head & Neck              | 7.79           | 4.95         | 5.19         | 3.97                               | 0.51      | 21.34         | 0.68                |
| Melanoma Primary         | 5.66           | 12.32        | 2.49         | 1.20                               | 1.82      | 19.76         | 1.14                |
| Melanoma Metastasis      | 5.99           | 4.83         | 1.93         | 0.71                               | 0.77      | 17.57         | 1.40                |
| Sarcoma                  | 3.37           | 2.65         | 2.28         | 1.63                               | 0.41      | 21.89         | 0.67                |
| Ovary                    | 4.37           | 2.36         | 1.66         | 0.98                               | 0.34      | 18.06         | 0.86                |
| Endometrium              | 3.85           | 4.14         | 1.78         | 1.35                               | 0.51      | 16.30         | 0.89                |
| Cervix                   | 4.37           | 1.85         | 2.98         | 4.22                               | 0.22      | 11.34         | 0.57                |
| Kidney Chromophobe       | 2.51           | 0.87         | 3.87         | 1.65                               | 0.16      | 13.58         | 0.01                |
| Kidney Oncocytoma        | 1.35           | 0.18         | 2.04         | 0.83                               | 0.01      | 5.56          | 0.00                |
| Sarcoma Ewing            | 0.86           | 2.42         | 0.48         | 0.35                               | 0.19      | 10.19         | 1.14                |
| Pilocytic Astrocytoma    | 0.63           | 0.27         | 0.20         | 2.17                               | 0.00      | 18.11         | 0.91                |
| Glioblastoma             | 0.57           | 0.60         | 0.20         | 1.29                               | 0.02      | 12.27         | 0.67                |
| Low Grade Glioma         | 0.61           | 0.27         | 0.22         | 1.38                               | 0.01      | 7.18          | 0.42                |
| PNET                     | 0.41           | 0.66         | 0.22         | 0.77                               | 0.02      | 6.12          | 0.39                |
| Ependymoma               | 0.26           | 0.60         | 0.00         | 0.55                               | 0.02      | 6.00          | 0.18                |
| Medulloblastoma          | 0.09           | 1.63         | 0.03         | 0.38                               | 0.00      | 2.07          | 0.03                |

| <b>AML subtype</b> | <b>B cells</b> | <b>T CD4</b> | <b>T CD8</b> | <b>T <math>\gamma\delta</math></b> | <b>NK</b> | <b>MoMaDC</b> | <b>granulocytes</b> |
|--------------------|----------------|--------------|--------------|------------------------------------|-----------|---------------|---------------------|
| RAEB               | 7.56           | 48.19        | 25.66        | 2.81                               | 8.09      | 48.47         | 38.35               |
| RAEB-t             | 5.27           | 24.66        | 10.28        | 7.15                               | 3.19      | 59.85         | 18.91               |
| M0                 | 12.72          | 18.51        | 8.92         | 7.42                               | 2.63      | 33.28         | 8.33                |
| M1                 | 9.31           | 8.97         | 8.17         | 9.23                               | 1.09      | 19.88         | 10.34               |
| M2                 | 10.53          | 10.95        | 11.08        | 8.90                               | 1.94      | 28.49         | 19.68               |
| M3                 | 6.17           | 6.00         | 11.56        | 17.43                              | 0.46      | 11.44         | 16.84               |
| M4                 | 4.41           | 4.11         | 5.87         | 4.14                               | 0.75      | 71.06         | 12.95               |
| M5                 | 4.75           | 4.29         | 5.32         | 3.33                               | 0.86      | 68.16         | 8.96                |
| M6                 | 9.64           | 20.26        | 10.94        | 8.94                               | 3.97      | 28.98         | 19.05               |
| M7                 | 14.31          | 33.26        | 17.01        | 7.61                               | 12.35     | 39.48         | 12.11               |

**Supplemental table 5: Abundance of leukocytes infiltrating cancers.** Data are group means for each malignancy

| <b>GSE number</b> | <b>Number of samples</b> | <b>Cancer type</b> | <b>First author</b> | <b>reference</b> |
|-------------------|--------------------------|--------------------|---------------------|------------------|
| E-TABM-783        | 35                       | AITL, PTCL         | Leval L             | <sup>31</sup>    |

Continued on next page

– continued from previous page

| GSE number | Number of samples | Cancer type                                                                                                                                                                    | First author       | reference |
|------------|-------------------|--------------------------------------------------------------------------------------------------------------------------------------------------------------------------------|--------------------|-----------|
| E-TABM-791 | 8                 | PTCL, PTCL-NK                                                                                                                                                                  | Huang Y            | 32        |
| GSE10139   | 108               | CCL                                                                                                                                                                            | Friedman DR        | 33        |
| GSE10358   | 304               | AML                                                                                                                                                                            | Tomasson MH        | 34        |
| GSE10524   | 80                | DLBCL                                                                                                                                                                          | Booman M           | 35        |
| GSE10846   | 420               | DLBCL                                                                                                                                                                          | Lenz G             | 36        |
| GSE11151   | 67                | kidney                                                                                                                                                                         | Yusenko MV         | 37        |
| GSE11318   | 406               | DLBCL                                                                                                                                                                          | Lenz G             | 38        |
| GSE11877   | 207               | ALL                                                                                                                                                                            | Kang H             | 39        |
| GSE12195   | 136               | DLBCL, FL                                                                                                                                                                      | Compagno M         | 4         |
| GSE12417   | 405               | AML                                                                                                                                                                            | Metzeler KH        | 40        |
| GSE12453   | 67                | BL, DLBCL, FL, HL, THRBL                                                                                                                                                       | Brune V            | 41        |
| GSE12734   | 14                | CLL                                                                                                                                                                            | Stamatopoulos B    | 42        |
| GSE13041   | 27                | GBM                                                                                                                                                                            | Lee Y              | 43        |
| GSE13159   | 2011              | ALL, AML, B-ALL, CLL, CML, MDS, T-ALL                                                                                                                                          | Kohlmann A         | 44        |
| GSE13996   | 73                | HL, THRBL                                                                                                                                                                      | Chetaille B        | 45        |
| GSE14468   | 526               | AML                                                                                                                                                                            | Wouters BJ         | 46        |
| GSE14973   | 14                | CLL                                                                                                                                                                            | Stamatopoulos B    | 47        |
| GSE15471   | 78                | pancreas                                                                                                                                                                       | Badea L            | 48        |
| GSE15490   | 50                | CLL                                                                                                                                                                            | Shehata M          | 49        |
| GSE15605   | 74                | melanoma                                                                                                                                                                       | Raskin L           | 50        |
| GSE15913   | 40                | CLL                                                                                                                                                                            | Giannopoulos K     | 51        |
| GSE16024   | 26                | FL, MCL                                                                                                                                                                        | Hamoudi R          |           |
| GSE16455   | 55                | CCL, FL, HCL, MCL, SMZL                                                                                                                                                        | Fernández V        | 52        |
| GSE17189   | 17                | BL, DLBCL                                                                                                                                                                      | Deffenbacher KE    | 53        |
| GSE17920   | 130               | HL                                                                                                                                                                             | Steidl C           | 54        |
| GSE17951   | 154               | prostate                                                                                                                                                                       | Wang Y             | 55        |
| GSE46602   | 50                | prostate                                                                                                                                                                       | Mortensen MM       | 56        |
| GSE19067   | 44                | PTCL, PTCL-NK                                                                                                                                                                  | Iqbal J            | 57        |
| GSE19069   | 147               | AITL, ALCL, PTCL                                                                                                                                                               | Iqbal J            | 58        |
| GSE19982   | 30                | kidney                                                                                                                                                                         | Tan MH             | 59        |
| GSE21029   | 62                | CLL                                                                                                                                                                            | Herishanu Y        | 60        |
| GSE2109    | 2158              | ALCL, bladder, Breast, colorectal, DLBCL, endometrium, esophagus, FL, head & neck, kidney, liver, lung, melanoma, ovary, pancreas, prostate, sarcoma, stomach, thyroid, uterus | Curley E           |           |
| GSE21452   | 64                | MCL                                                                                                                                                                            | Hartmann EM        | 61        |
| GSE21554   | 69                | FL, MCL, SMZL                                                                                                                                                                  | Watkins AJ         | 62        |
| GSE22762   | 195               | CLL                                                                                                                                                                            | Herold T           | 63        |
| GSE23720   | 370               | breast                                                                                                                                                                         | Bekhouché I        | 64        |
| GSE25571   | 109               | CLL                                                                                                                                                                            | Herold T           | 65        |
| GSE26673   | 16                | BL                                                                                                                                                                             | Piccaluga PP T     | 66        |
| GSE26713   | 109               | CLL                                                                                                                                                                            | Herold T           | 65        |
| GSE25571   | 117               | T-ALL                                                                                                                                                                          | Homminga I         | 67        |
| GSE27858   | 56                | CLL                                                                                                                                                                            | Dürig J            | 68        |
| GSE28654   | 112               | CLL                                                                                                                                                                            | Trojani A          | 69        |
| GSE29605   | 22                | CLL                                                                                                                                                                            | Davidson-Mocada JK |           |
| GSE31048   | 221               | CLL                                                                                                                                                                            | Wang L             | 70        |
| GSE32701   | 40                | esophagus                                                                                                                                                                      | Aoyagi K           | 71        |
| GSE33075   | 27                | CML                                                                                                                                                                            | Benito R           | 72        |
| GSE33135   | 24                | CLL                                                                                                                                                                            | Baptista MJ        | 73        |
| GSE34171   | 510               | DLBCL                                                                                                                                                                          | Monti S            | 74        |
| GSE34620   | 117               | ewing sarcoma                                                                                                                                                                  | Postel-Vinay S     | 75        |
| GSE35935   | 62                | CLL                                                                                                                                                                            | Bonina S           |           |
| GSE36000   | 38                | MCL                                                                                                                                                                            | Navarro A          | 76        |
| GSE37168   | 13                | CLL                                                                                                                                                                            | Landau DA          | 77        |
| GSE38816   | 18                | FL                                                                                                                                                                             | Green MR           | 78        |
| GSE39133   | 34                | HL                                                                                                                                                                             | Steidl C           | 79        |
| GSE42038   | 79                | T-ALL                                                                                                                                                                          | Horstmann MA       |           |
| GSE44971   | 58                | pilocytic astrocytoma                                                                                                                                                          | Lambert SR         | 80        |
| GSE46170   | 38                | T-ALL                                                                                                                                                                          | Hatirnaz Ng O      |           |
| GSE4732    | 303               | BL, DLBCL                                                                                                                                                                      | Dave SS            | 81        |
| GSE4845    | 45                | melanoma                                                                                                                                                                       | Hoek KS            | 82        |
| GSE50161   | 130               | ependymoma, GBM, MB, pilocytic astrocytoma                                                                                                                                     | Griesinger AM      | 83        |
| GSE50570   | 6                 | pancreas                                                                                                                                                                       | Seqq V             |           |

Continued on next page



– continued from previous page

| <b>GSE number</b> | <b>Number of samples</b> | <b>Cancer type</b>                 | <b>First author</b> | <b>reference</b> |
|-------------------|--------------------------|------------------------------------|---------------------|------------------|
| GSE53117          | 10                       | DLBCL                              | Chapman J           | 84               |
| GSE53786          | 5                        | DLBCL                              | Scott DW            | 85               |
| GSE53820          | 81                       | DLBCL, FL                          | Brodtkorb M,        | 86               |
| GSE55267          | 69                       | FL                                 | Guo S               | 87               |
| GSE57303          | 70                       | stomach                            | Qian Z              | 88               |
| GSE58445          | 193                      | PTCL                               | Iqbal J             | 89               |
| GSE6338           | 60                       | AITL, ALCL, PTCL                   | Piccaluga PP        | 90               |
| GSE64086          | 12                       | BL                                 | Ferreiro JF         | 91               |
| GSE64905          | 11                       | BL                                 | Lee S               |                  |
| GSE65135          | 26                       | DLBCL, FL                          | Newman AM           | 28               |
| GSE65823          | 31                       | ALCL, PTCL                         | Scarfò I            | 92               |
| GSE6791           | 84                       | Cervix, head & neck                | Pyeon D             | 93               |
| GSE68848          | 580                      | GBM, low grade glioma              | Fine H              |                  |
| GSE69049          | 93                       | BL, DLBCL                          | Barrans SL          |                  |
| GSE69051          | 250                      | BL, DLBCL                          | Barrans SL          |                  |
| GSE73038          | 182                      | GBM, MB, PNET                      | Sturm D             | 94               |
| GSE7307           | 677                      | breast, cervix, melanoma, prostate | Roth R              |                  |
| GSE7553           | 87                       | melanoma                           | Riker AI            | 95               |
| GSE7788           | 21                       | NLPHL, THRBL                       | Van Loo P           | 96               |
| GSE8271           | 34                       | kidney                             | Koeman JM           | 97               |

**Supplemental table 6: List of cancers studies**

## **Supplemental References**

## References

- [1] A. J. Gentles, A. M. Newman, C. L. Liu, S. V. Bratman, W. Feng, D. Kim, V. S. Nair, Y. Xu, A. Khuong, C. D. Hoang *et al.*, The prognostic landscape of genes and infiltrating immune cells across human cancers, *Nature medicine* 2015; 21:938–945.
- [2] M. Tosolini, C. Algans, F. Pont, B. Ycart, and J.-J. Fournié, Large scale microarray profiling reveals four stages of immune escape in non-hodgkin lymphomas, *OncoImmunology* 2016; 5:e1188246.
- [3] S. Maouche, O. Poirier, T. Godefroy, R. Olasso, I. Gut, J.-P. Collet, G. Montalescot, and F. Cambien, Performance comparison of two microarray platforms to assess differential gene expression in human monocyte and macrophage cells, *BMC genomics* 2008; 9:1.
- [4] M. Compagno, W. K. Lim, A. Grunn, S. V. Nandula, M. Brahmachary, Q. Shen, F. Bertoni, M. Ponzoni, M. Scandurra, A. Califano *et al.*, Mutations of multiple genes cause deregulation of  $\text{nf}\kappa\text{b}$  in diffuse large b-cell lymphoma, *Nature* 2009; 459:717–721.
- [5] S. C. Bangs, D. Baban, H. J. Cattani, C. K.-F. Li, A. J. McMichael, and X.-N. Xu, Human  $\text{cd4}^+$  memory t cells are preferential targets for bystander activation and apoptosis, *The Journal of Immunology* 2009; 182:1962–1971.
- [6] S. Eckerle, V. Brune, C. Döring, E. Tiacchi, V. Bohle, C. Sundström, R. Kodet, M. Paulli, B. Falini, W. Klapper *et al.*, Gene expression profiling of isolated tumour cells from anaplastic large cell lymphomas: insights into its cellular origin, pathogenesis and relation to hodgkin lymphoma, *Leukemia* 2009; 23:2129–2138.
- [7] M. C. Bosco, D. Pierobon, F. Blengio, F. Raggi, C. Vanni, M. Gattorno, A. Eva, F. Novelli, P. Cappello, M. Giovarelli *et al.*, Hypoxia modulates the gene expression profile of immunoregulatory receptors in human mature dendritic cells: identification of  $\text{trem-1}$  as a novel hypoxic marker in vitro and in vivo, *Blood* 2011; 117:2625–2639.
- [8] F. Pont, J. Familiades, S. Déjean, S. Fruchon, D. Cendron, M. Pouput, R. Pouput, F. L'Faqihi-Olive, N. Prade, B. Ycart *et al.*, The gene expression profile of phosphoantigen-specific human  $\gamma\delta$  t lymphocytes is a blend of  $\alpha\beta$  t-cell and nk-cell signatures, *European journal of immunology* 2012; 42:228–240.
- [9] F. Allantaz, D. T. Cheng, T. Bergauer, P. Ravindran, M. F. Rossier, M. Ebeling, L. Badi, B. Reis, H. Bitter, M. D'Asaro *et al.*, Expression profiling of human immune cell subsets identifies mirna-mrna regulatory relationships correlated with cell type specific expression, *PLoS one* 2012; 7:e29979.
- [10] M. G. Constantinides, D. Picard, A. K. Savage, and A. Bendelac, A naive-like population of human  $\text{cd1d}$ -restricted t cells expressing intermediate levels of promyelocytic leukemia zinc finger, *The Journal of Immunology* 2011; 187:309–315.
- [11] M. Sirois, L. Robitaille, R. Allary, M. Shah, C. H. Woelk, J. Estaquier, and J. Corbeil,  $\text{traf6}$  and  $\text{irf7}$  control hiv replication in macrophages, *PLoS one* 2011; 6:e28125.
- [12] M. A. Favila, N. S. Geraci, E. Zeng, B. Harker, D. Condon, R. N. Cotton, A. Jayakumar, V. Tripathi, and M. A. McDowell, Human dendritic cells exhibit a pronounced type i ifn signature following leishmania major infection that is required for  $\text{il-12}$  induction, *The Journal of Immunology* 2014; 192:5863–5872.
- [13] K. Dybkær, M. Bøgsted, S. Falgreen, J. S. Bødker, M. K. Kjeldsen, A. Schmitz, A. E. Bilgrau, Z. Y. Xu-Monette, L. Li, K. S. Bergkvist *et al.*, Diffuse large b-cell lymphoma classification system that associates normal b-cell subset phenotypes with prognosis, *Journal of Clinical Oncology* 2015; 33:1379–1388.
- [14] H. E. Mei, I. Wirries, D. Frölich, M. Brisslert, C. Giesecke, J. R. Grün, T. Alexander, S. Schmidt, K. Luda, A. A. Köhl *et al.*, A unique population of  $\text{igg}$ -expressing plasma cells lacking  $\text{cd19}$  is enriched in human bone marrow, *Blood* 2015; 125:1739–1748.
- [15] M. Takeshita, K. Suzuki, Y. Kassai, M. Takiguchi, Y. Nakayama, Y. Otomo, R. Morita, T. Miyazaki, A. Yoshimura, and T. Takeuchi, Polarization diversity of human  $\text{cd4}^+$  stem cell memory t cells, *Clinical Immunology* 2015; 159:107–117.
- [16] G. J. Walter, V. Fleskens, K. S. Frederiksen, M. Rajasekhar, B. Menon, J. G. Gerwien, H. G. Evans, and L. S. Taams, Phenotypic, functional, and gene expression profiling of peripheral  $\text{cd45ra}^+$  and  $\text{cd45ro}^+$   $\text{cd4}^+$   $\text{cd25}^+$   $\text{cd127}^{\text{low}}$   $\text{treg}$  cells in patients with chronic rheumatoid arthritis, *Arthritis & Rheumatology* 2016; 68:103–116.
- [17] P. Amé-Thomas, S. Hoeller, C. Artchounin, J. Misiak, M. S. Braza, R. Jean, J. Le Priol, C. Monvoisin, N. Martin, P. Gaulard *et al.*,  $\text{Cd10}$  delineates a subset of human  $\text{il-4}$  producing follicular helper t cells involved in the survival of follicular lymphoma b cells, *Blood* 2015; 125:2381–2385.
- [18] K. Kanduri, S. Tripathi, A. Larjo, H. Mannerström, U. Ullah, R. Lund, R. D. Hawkins, B. Ren, H. Lähdesmäki, and R. Lahesmaa, Identification of global regulators of t-helper cell lineage specification, *Genome medicine* 2015; 7:1.
- [19] X. Du, Y. Tang, H. Xu, L. Lit, W. Walker, P. Ashwood, J. P. Gregg, and F. R. Sharp, Genomic profiles for human peripheral blood t cells, b cells, natural killer cells, monocytes, and polymorphonuclear cells: comparisons to ischemic stroke, migraine, and tourette syndrome, *Genomics* 2006; 87:693–703.
- [20] K. Dybkaer, J. Iqbal, G. Zhou, H. Geng, L. Xiao, A. Schmitz, F. d'Amore, and W. C. Chan, Genome wide transcriptional analysis of resting and  $\text{il2}$  activated human natural killer cells: gene expression signatures indicative of novel molecular signaling pathways, *BMC genomics* 2007; 8:1.
- [21] A. R. Abbas, K. Wolslegel, D. Seshasayee, Z. Modrusan, and H. F. Clark, Deconvolution of blood microarray data identifies cellular activation patterns in systemic lupus erythematosus, *PLoS one* 2009; 4:e6098.
- [22] Y. Zhang, J. H. Ohyashiki, N. Shimizu, and K. Ohyashiki, Aberrant expression of nk cell receptors in epstein-barr virus-positive  $\gamma\delta$  t-cell lymphoproliferative disorders, *Hematology* 2013; .
- [23] K. A. Stegmann, N. K. Björkström, H. Veber, S. Ciesek, P. Riese, J. Wiegand, J. Hadem, P. V. Suneetha, J. Jaroszewicz, C. Wang *et al.*, Interferon- $\alpha$ -induced  $\text{trail}$  on natural killer cells is associated with control of hepatitis c virus infection, *Gastroenterology* 2010; 138:1885–1897.
- [24] D. C. Vinh, S. Y. Patel, G. Uzel, V. L. Anderson, A. F. Freeman, K. N. Olivier, C. Spalding, S. Hughes, S. Pittaluga, M. Raffeld *et al.*, Autosomal dominant and sporadic monocytopenia with susceptibility to mycobacteria, fungi, papillomaviruses, and myelodysplasia, *Blood* 2010; 115:1519–1529.

- [25] S. S. Shen-Orr, R. Tibshirani, P. Khatri, D. L. Bodian, F. Staedtler, N. M. Perry, T. Hastie, M. M. Sarwal, M. M. Davis, and A. J. Butte, Cell type-specific gene expression differences in complex tissues, *Nature methods* 2010; 7:287–289.
- [26] T. Raine, J. Z. Liu, C. A. Anderson, M. Parkes, and A. Kaser, Generation of primary human intestinal t cell transcriptomes reveals differential expression at genetic risk loci for immune-mediated disease, *Gut* 2014; gutjnl–2013.
- [27] M. N. Lee, C. Ye, A.-C. Villani, T. Raj, W. Li, T. M. Eisenhaure, S. H. Imboya, P. I. Chipendo, F. A. Ran, K. Slowikowski *et al.*, Common genetic variants modulate pathogen-sensing responses in human dendritic cells, *Science* 2014; 343:1246980.
- [28] A. M. Newman, C. L. Liu, M. R. Green, A. J. Gentles, W. Feng, Y. Xu, C. D. Hoang, M. Diehn, and A. A. Alizadeh, Robust enumeration of cell subsets from tissue expression profiles, *Nature methods* 2015; 12:453–457.
- [29] M. D. Hycza, C. Kovacs, M. Loutfy, R. Halpenny, L. Heisler, S. Yang, O. Wilkins, M. Ostrowski, and S. D. Der, Distinct transcriptional profiles in ex vivo cd4+ and cd8+ t cells are established early in human immunodeficiency virus type 1 infection and are characterized by a chronic interferon response as well as extensive transcriptional changes in cd8+ t cells, *Journal of virology* 2007; 81:3477–3486.
- [30] D. Vermijlen, M. Brouwer, C. Donner, C. Liesnard, M. Tackoen, M. Van Rysselberge, N. Twité, M. Goldman, A. Marchant, and F. Willems, Human cytomegalovirus elicits fetal  $\gamma\delta$  t cell responses in utero, *The Journal of experimental medicine* 2010; 207:807–821.
- [31] L. de Leval, D. S. Rickman, C. Thielen, A. de Reynies, Y.-L. Huang, G. Delsol, L. Lamant, K. Leroy, J. Briere, T. Molina *et al.*, The gene expression profile of nodal peripheral t-cell lymphoma demonstrates a molecular link between angioimmunoblastic t-cell lymphoma (aitl) and follicular helper t (tfh) cells, *Blood* 2007; 109:4952–4963.
- [32] Y. Huang, A. De Reynies, L. De Leval, B. Ghazi, N. Martin-Garcia, M. Travert, J. Bosq, J. Brière, B. Petit, E. Thomas *et al.*, Gene expression profiling identifies emerging oncogenic pathways operating in extranodal nk/t-cell lymphoma, nasal type, *Blood* 2010; 115:1226–1237.
- [33] D. R. Friedman, J. B. Weinberg, W. T. Barry, B. K. Goodman, A. D. Volkheimer, K. M. Bond, Y. Chen, N. Jiang, J. O. Moore, J. P. Gockerman *et al.*, A genomic approach to improve prognosis and predict therapeutic response in chronic lymphocytic leukemia, *Clinical Cancer Research* 2009; 15:6947–6955.
- [34] M. H. Tomasson, Z. Xiang, R. Walgren, Y. Zhao, Y. Kasai, T. Miner, R. E. Ries, O. Lubman, D. H. Fremont, M. D. McLellan *et al.*, Somatic mutations and germline sequence variants in the expressed tyrosine kinase genes of patients with de novo acute myeloid leukemia, *Blood* 2008; 111:4797–4808.
- [35] M. Booman, K. Szuhai, A. Rosenwald, E. Hartmann, H. C. Kluin-Nelemans, D. de Jong, E. Schuurings, and P. Kluin, Genomic alterations and gene expression in primary diffuse large b-cell lymphomas of immune-privileged sites: the importance of apoptosis and immunomodulatory pathways, *The Journal of pathology* 2008; 216:209–217.
- [36] G. Lenz, G. Wright, S. Dave, W. Xiao, J. Powell, H. Zhao, W. Xu, B. Tan, N. Goldschmidt, J. Iqbal *et al.*, Stromal gene signatures in large-b-cell lymphomas, *New England Journal of Medicine* 2008; 359:2313–2323.
- [37] M. V. Yusenko, R. P. Kuiper, T. Boethe, B. Ljungberg, A. G. van Kessel, and G. Kovacs, High-resolution dna copy number and gene expression analyses distinguish chromophobe renal cell carcinomas and renal oncocytomas, *BMC cancer* 2009; 9:1.
- [38] G. Lenz, G. W. Wright, N. T. Emre, H. Kohlhammer, S. S. Dave, R. E. Davis, S. Carty, L. T. Lam, A. Shaffer, W. Xiao *et al.*, Molecular subtypes of diffuse large b-cell lymphoma arise by distinct genetic pathways, *Proceedings of the National Academy of Sciences* 2008; 105:13520–13525.
- [39] H. Kang, I.-M. Chen, C. S. Wilson, E. J. Bedrick, R. C. Harvey, S. R. Atlas, M. Devidas, C. G. Mullighan, X. Wang, M. Murphy *et al.*, Gene expression classifiers for relapse-free survival and minimal residual disease improve risk classification and outcome prediction in pediatric b-precursor acute lymphoblastic leukemia, *Blood* 2010; 115:1394–1405.
- [40] K. H. Metzeler, M. Hummel, C. D. Bloomfield, K. Spiekermann, J. Braess, M.-C. Sauerland, A. Heinecke, M. Radmacher, G. Marcucci, S. P. Whitman *et al.*, An 86-probe-set gene-expression signature predicts survival in cytogenetically normal acute myeloid leukemia, *Blood* 2008; 112:4193–4201.
- [41] V. Brune, E. Tiacci, I. Pfeil, C. Döring, S. Eckerle, C. J. van Noesel, W. Klapper, B. Falini, A. von Heydebreck, D. Metzler *et al.*, Origin and pathogenesis of nodular lymphocyte-predominant hodgkin lymphoma as revealed by global gene expression analysis, *The Journal of experimental medicine* 2008; 205:2251–2268.
- [42] B. Stamatopoulos, B. Haibe-Kains, C. Equeter, N. Meuleman, A. Sorée, C. De Bruyn, D. Hanosset, D. Bron, P. Martiat, and L. Lagneaux, Gene expression profiling reveals differences in microenvironment interaction between patients with chronic lymphocytic leukemia expressing high versus low zap70 mrna, *haematologica* 2009; 94:790–799.
- [43] Y. Lee, A. C. Scheck, T. F. Cloughesy, A. Lai, J. Dong, H. K. Farooqi, L. M. Liau, S. Horvath, P. S. Mischel, and S. F. Nelson, Gene expression analysis of glioblastomas identifies the major molecular basis for the prognostic benefit of younger age, *BMC medical genomics* 2008; 1:1.
- [44] A. Kohlmann, T. J. Kipps, L. Z. Rassenti, J. R. Downing, S. A. Shurtleff, K. I. Mills, A. F. Gilkes, W.-K. Hofmann, G. Basso, M. C. Dell’Orto *et al.*, An international standardization programme towards the application of gene expression profiling in routine leukaemia diagnostics: the microarray innovations in leukemia study prephase, *British journal of haematology* 2008; 142:802–807.
- [45] B. Chetaille, F. Bertucci, P. Finetti, B. Esterni, A. Stamatoullas, J. M. Picquetot, M. C. Copin, F. Morschhauser, O. Casasnovas, T. Petrella *et al.*, Molecular profiling of classical hodgkin lymphoma tissues uncovers variations in the tumor microenvironment and correlations with ebv infection and outcome, *Blood* 2009; 113:2765–3775.
- [46] B. J. Wouters, B. Löwenberg, C. A. Erpelinck-Verschueren, W. L. van Putten, P. J. Valk, and R. Delwel, Double cebpa mutations, but not single cebpa mutations, define a subgroup of acute myeloid leukemia with a distinctive gene expression profile that is uniquely associated with a favorable outcome, *Blood* 2009; 113:3088–3091.
- [47] B. Stamatopoulos, N. Meuleman, C. De Bruyn, P. Mineur, P. Martiat, D. Bron, and L. Lagneaux, Antileukemic activity of valproic acid in chronic lymphocytic leukemia b cells defined by microarray analysis, *Leukemia* 2009; 23:2281–2289.

- [48] L. Badea, V. Herlea, S. O. Dima, T. Dumitrascu, I. Popescu, et al., Combined gene expression analysis of whole-tissue and microdissected pancreatic ductal adenocarcinoma identifies genes specifically overexpressed in tumor epithelia—the authors reported a combined gene expression analysis of whole-tissue and microdissected pancreatic ductal adenocarcinoma identifies genes specifically overexpressed in tumor epithelia, *Hepato-gastroenterology* 2008; 55:2016.
- [49] M. Shehata, D. Demirtas, S. Schnabl, M. Hilgarth, R. Hubmann, C. Fonatsch, I. Schwarzingler, G. Hopfinger, K. Eigenberger, D. Heintel *et al.*, Sequential gene expression profiling during treatment for identification of predictive markers and novel therapeutic targets in chronic lymphocytic leukemia, *Leukemia* 2010; 24:2122–2127.
- [50] L. Raskin, D. R. Fullen, T. J. Giordano, D. G. Thomas, M. L. Frohm, K. B. Cha, J. Ahn, B. Mukherjee, T. M. Johnson, and S. B. Gruber, Transcriptome profiling identifies *hmg2* as a biomarker of melanoma progression and prognosis, *Journal of Investigative Dermatology* 2013; 133:2585–2592.
- [51] K. Giannopoulos, A. Dmoszynska, M. Kowal, E. Wkasik-Szczepanek, A. Bojarska-Junak, J. Rolinski, H. Döhner, S. Stilgenbauer, and L. Bullinger, Thalidomide exerts distinct molecular antileukemic effects and combined thalidomide/fludarabine therapy is clinically effective in high-risk chronic lymphocytic leukemia, *Leukemia* 2009; 23:1771–1778.
- [52] V. Fernández, O. Salamero, B. Espinet, F. Solé, C. Royo, A. Navarro, F. Camacho, S. Beà, E. Hartmann, V. Amador *et al.*, Genomic and gene expression profiling defines indolent forms of mantle cell lymphoma, *Cancer research* 2010; 70:1408–1418.
- [53] K. E. Deffenbacher, J. Iqbal, Z. Liu, K. Fu, and W. C. Chan, Recurrent chromosomal alterations in molecularly classified aids-related lymphomas: an integrated analysis of dna copy number and gene expression, *JAIDS Journal of Acquired Immune Deficiency Syndromes* 2010; 54:18–26.
- [54] C. Steidl, T. Lee, S. P. Shah, P. Farinha, G. Han, T. Nayar, A. Delaney, S. J. Jones, J. Iqbal, D. D. Weisenburger *et al.*, Tumor-associated macrophages and survival in classic hodgkin’s lymphoma, *New England Journal of Medicine* 2010; 362:875–885.
- [55] Y. Wang, X.-Q. Xia, Z. Jia, A. Sawyers, H. Yao, J. Wang-Rodriguez, D. Mercola, and M. McClelland, In silico estimates of tissue components in surgical samples based on expression profiling data, *Cancer research* 2010; 70:6448–6455.
- [56] M. M. Mortensen, S. Høyer, A.-S. Lynnerup, T. F. Ørntoft, K. D. Sørensen, M. Borre, and L. Dyrskjøt, Expression profiling of prostate cancer tissue delineates genes associated with recurrence after prostatectomy, *Scientific reports* 2015; 5.
- [57] J. Iqbal, D. Weisenburger, A. Chowdhury, M. Y. Tsai, G. Srivastava, T. C. Greiner, C. Kucuk, K. Deffenbacher, J. Vose, L. Smith *et al.*, Natural killer cell lymphoma shares strikingly similar molecular features with a group of non-hepatosplenic  $\gamma\delta$  t-cell lymphoma and is highly sensitive to a novel aurora kinase a inhibitor in vitro, *Leukemia* 2011; 25:348–358.
- [58] J. Iqbal, D. D. Weisenburger, T. C. Greiner, J. M. Vose, T. McKeithan, C. Kucuk, H. Geng, K. Deffenbacher, L. Smith, K. Dybkaer *et al.*, Molecular signatures to improve diagnosis in peripheral t-cell lymphoma and prognostication in angioimmunoblastic t-cell lymphoma, *Blood* 2010; 115:1026–1036.
- [59] M.-H. Tan, C. F. Wong, H. L. Tan, X. J. Yang, J. Ditlev, D. Matsuda, S. K. Khoo, J. Sugimura, T. Fujioka, K. A. Furge *et al.*, Genomic expression and single-nucleotide polymorphism profiling discriminates chromophobe renal cell carcinoma and oncocytoma, *BMC cancer* 2010; 10:1.
- [60] Y. Herishanu, P. Pérez-Galán, D. Liu, A. Biancotto, S. Pittaluga, B. Vire, F. Gibellini, N. Njuguna, E. Lee, L. Stennett *et al.*, The lymph node microenvironment promotes b-cell receptor signaling, *nf- $\kappa$ b* activation, and tumor proliferation in chronic lymphocytic leukemia, *Blood* 2011; 117:563–574.
- [61] E. M. Hartmann, E. Campo, G. Wright, G. Lenz, I. Salaverria, P. Jares, W. Xiao, R. M. Braziel, L. M. Rimsza, W.-C. Chan *et al.*, Pathway discovery in mantle cell lymphoma by integrated analysis of high-resolution gene expression and copy number profiling, *Blood* 2010; 116:953–961.
- [62] A. J. Watkins, R. A. Hamoudi, N. Zeng, Q. Yan, Y. Huang, H. Liu, J. Zhang, E. Braggio, R. Fonseca, L. de Leval *et al.*, An integrated genomic and expression analysis of 7q deletion in splenic marginal zone lymphoma, *PLoS ONE* 2012; 7.
- [63] T. Herold, V. Jurinovic, K. Metzeler, A.-L. Boulesteix, M. Bergmann, T. Seiler, M. Mulaw, S. Thoene, A. Dufour, Z. Pasalic *et al.*, An eight-gene expression signature for the prediction of survival and time to treatment in chronic lymphocytic leukemia, *Leukemia* 2011; 25:1639–1645.
- [64] I. Bekhouche, P. Finetti, J. Adelaïde, A. Ferrari, C. Tarpin, E. Charafe-Jauffret, C. Charpin, G. Houvenaeghel, J. Jacquemier, G. Bidaut *et al.*, High-resolution comparative genomic hybridization of inflammatory breast cancer and identification of candidate genes, *PLoS One* 2011; 6:e16950.
- [65] T. Herold, V. Jurinovic, M. Mulaw, T. Seiler, A. Dufour, S. Schneider, P. M. Kakadia, M. Feuring-Buske, J. Braess, K. Spiekermann *et al.*, Expression analysis of genes located in the minimally deleted regions of 13q14 and 11q22-23 in chronic lymphocytic leukemia—unexpected expression pattern of the rho gtpase activator *arhgap20*, *Genes, Chromosomes and Cancer* 2011; 50:546–558.
- [66] P. P. Piccaluga, G. De Falco, M. Kustagi, A. Gazzola, C. Agostinelli, C. Tripodo, E. Leucci, A. Onnis, A. Astolfi, M. R. Sapienza *et al.*, Gene expression analysis uncovers similarity and differences among burkitt lymphoma subtypes, *Blood* 2011; 117:3596–3608.
- [67] I. Homminga, R. Pieters, A. W. Langerak, J. J. de Rooi, A. Stubbs, M. Verstegen, M. Vuerhard, J. Buijs-Gladdines, C. Kooi, P. Klous *et al.*, Integrated transcript and genome analyses reveal *nkx2-1* and *mf2c* as potential oncogenes in t cell acute lymphoblastic leukemia, *Cancer cell* 2011; 19:484–497.
- [68] J. Dürig, U. Dührsen, L. Klein-Hitpass, J. Worm, J. R. Hansen, H. Ørum, and M. Wissenbach, The novel antisense *bcl-2* inhibitor *spc2996* causes rapid leukemic cell clearance and immune activation in chronic lymphocytic leukemia, *Leukemia* 2011; 25:638–647.
- [69] A. Trojani, B. Di Camillo, A. Tedeschi, M. Lodola, S. Montesano, F. Ricci, E. Vismara, A. Greco, S. Veronese, A. Orlicchio *et al.*, Gene expression profiling identifies *arsd* as a new marker of disease progression and the sphingolipid metabolism as a potential novel metabolism in chronic lymphocytic leukemia., *Cancer biomarkers: section A of Disease markers* 2010; 11:15–28.
- [70] L. Wang, A. K. Shalek, M. Lawrence, R. Ding, J. T. Gaublomme, N. Pochet, P. Stojanov, C. Sougnez, S. A. Shukla, K. E. Stevenson *et al.*, Somatic mutation as a mechanism of *wnt/ $\beta$ -catenin* pathway activation in cll, *Blood* 2014; blood–2014.

- [71] K. Aoyagi, K. Minashi, H. Igaki, Y. Tachimori, T. Nishimura, N. Hokamura, A. Ashida, H. Daiko, A. Ochiai, M. Muto *et al.*, Artificially induced epithelial-mesenchymal transition in surgical subjects: its implications in clinical and basic cancer research, *PLoS One* 2011; 6:e18196.
- [72] R. Benito, E. Lumbreras, M. Abáigar, N. C. Gutierrez, M. Delgado, C. Robledo, J. L. García, A. E. Rodríguez-Vicente, M. C. Cañizo, and J. M. H. Rivas, Imatinib therapy of chronic myeloid leukemia restores the expression levels of key genes for dna damage and cell-cycle progression, *Pharmacogenetics and genomics* 2012; 22:381–388.
- [73] M. J. Baptista, A. Muntañola, E. Calpe, P. Abrisqueta, O. Salamero, E. Fernández, C. Codony, E. Giné, S. G. Kalko, M. Crespo *et al.*, Differential gene expression profile associated to apoptosis induced by dexamethasone in cll cells according to ighv/zap-70 status, *Clinical Cancer Research* 2012; 18:5924–5933.
- [74] S. Monti, B. Chapuy, K. Takeyama, S. J. Rodig, Y. Hao, K. T. Yeda, H. Inguilizian, C. Mermel, T. Currie, A. Dogan *et al.*, Integrative analysis reveals an outcome-associated and targetable pattern of p53 and cell cycle deregulation in diffuse large b cell lymphoma, *Cancer cell* 2012; 22:359–372.
- [75] S. Postel-Vinay, A. S. Véron, F. Tirode, G. Pierron, S. Reynaud, H. Kovar, O. Oberlin, E. Lapouble, S. Ballet, C. Lucchesi *et al.*, Common variants near *tardbp* and *egr2* are associated with susceptibility to ewing sarcoma, *Nature genetics* 2012; 44:323–327.
- [76] A. Navarro, G. Clot, C. Royo, P. Jares, A. Hadzidimitriou, A. Agathangelidis, V. Bikos, N. Darzentas, T. Papadaki, I. Salaverria *et al.*, Molecular subsets of mantle cell lymphoma defined by the ighv mutational status and *sox11* expression have distinct biologic and clinical features, *Cancer research* 2012; 72:5307–5316.
- [77] D. A. Landau, S. L. Carter, P. Stojanov, A. McKenna, K. Stevenson, M. S. Lawrence, C. Sougnez, C. Stewart, A. Sivachenko, L. Wang *et al.*, Evolution and impact of subclonal mutations in chronic lymphocytic leukemia, *Cell* 2013; 152:714–726.
- [78] M. R. Green, A. J. Gentles, R. V. Nair, J. M. Irish, S. Kihira, C. L. Liu, I. Kela, E. S. Hopmans, J. H. Myklebust, H. Ji *et al.*, Hierarchy in somatic mutations arising during genomic evolution and progression of follicular lymphoma, *Blood* 2013; 121:1604–1611.
- [79] C. Steidl, A. Diepstra, T. Lee, F. C. Chan, P. Farinha, K. Tan, A. Telenius, L. Barclay, S. P. Shah, J. M. Connors *et al.*, Gene expression profiling of microdissected hodgkin reed-sternberg cells correlates with treatment outcome in classical hodgkin lymphoma, *Blood* 2012; 120:3530–3540.
- [80] S. R. Lambert, H. Witt, V. Hovestadt, M. Zucknick, M. Kool, D. M. Pearson, A. Korshunov, M. Ryzhova, K. Ichimura, N. Jabado *et al.*, Differential expression and methylation of brain developmental genes define location-specific subsets of pilocytic astrocytoma, *Acta neuropathologica* 2013; 126:291–301.
- [81] S. S. Dave, K. Fu, G. W. Wright, L. T. Lam, P. Kluin, E.-J. Boerma, T. C. Greiner, D. D. Weisenburger, A. Rosenwald, G. Ott *et al.*, Molecular diagnosis of burkitt's lymphoma, *New England Journal of Medicine* 2006; 354:2431–2442.
- [82] K. S. Hoek, N. C. Schlegel, P. Brafford, A. Sucker, S. Ugurel, R. Kumar, B. L. Weber, K. L. Nathanson, D. J. Phillips, M. Herlyn *et al.*, Metastatic potential of melanomas defined by specific gene expression profiles with no *braf* signature, *Pigment Cell Research* 2006; 19:290–302.
- [83] A. M. Griesinger, D. K. Birks, A. M. Donson, V. Amani, L. M. Hoffman, A. Waziri, M. Wang, M. H. Handler, and N. K. Foreman, Characterization of distinct immunophenotypes across pediatric brain tumor types, *The Journal of Immunology* 2013; 191:4880–4888.
- [84] J. Chapman, A. Gentles, V. Sujoy, F. Vega, C. Dumur, T. Blevins, L. Bernal-Mizrachi, M. Mosunjac, A. Pimentel, D. Zhu *et al.*, Gene expression analysis of plasmablastic lymphoma identifies downregulation of b-cell receptor signaling and additional unique transcriptional programs, *Leukemia* 2015; .
- [85] D. W. Scott, G. W. Wright, P. M. Williams, C.-J. Lih, W. Walsh, E. S. Jaffe, A. Rosenwald, E. Campo, W. C. Chan, J. M. Connors *et al.*, Determining cell-of-origin subtypes of diffuse large b-cell lymphoma using gene expression in formalin-fixed paraffin-embedded tissue, *Blood* 2014; 123:1214–1217.
- [86] M. Brodtkorb, O. C. Lingjærde, K. Huse, G. Trøen, M. Hystad, V. I. Hilden, J. H. Myklebust, E. Leich, A. Rosenwald, J. Delabie *et al.*, Whole-genome integrative analysis reveals expression signatures predicting transformation in follicular lymphoma, *Blood* 2014; 123:1051–1054.
- [87] S. Guo, J. K. Chan, J. Iqbal, T. McKeithan, K. Fu, B. Meng, Y. Pan, W. Cheuk, D. Luo, R. Wang *et al.*, *Ezh2* mutations in follicular lymphoma from different ethnic groups and associated gene expression alterations, *Clinical Cancer Research* 2014; 20:3078–3086.
- [88] Z. Qian, G. Zhu, L. Tang, M. Wang, L. Zhang, J. Fu, C. Huang, S. Fan, Y. Sun, J. Lv *et al.*, Whole genome gene copy number profiling of gastric cancer identifies *pak1* and *kras* gene amplification as therapy targets, *Genes, Chromosomes and Cancer* 2014; 53:883–894.
- [89] J. Iqbal, G. Wright, C. Wang, A. Rosenwald, R. D. Gascoyne, D. D. Weisenburger, T. C. Greiner, L. Smith, S. Guo, R. A. Wilcox *et al.*, Gene expression signatures delineate biological and prognostic subgroups in peripheral t-cell lymphoma, *Blood* 2014; 123:2915–2923.
- [90] P. P. Piccaluga, C. Agostinelli, A. Califano, M. Rossi, K. Basso, S. Zupo, P. Went, U. Klein, P. L. Zinzani, M. Baccarani *et al.*, Gene expression analysis of peripheral t cell lymphoma, unspecified, reveals distinct profiles and new potential therapeutic targets, *Journal of Clinical Investigation* 2007; 117:823.
- [91] J. F. Ferreira, J. Morscio, D. Dierickx, L. Marcelis, G. Verhoef, P. Vandenberghe, T. Tousseyn, and I. Wlodarska, Post-transplant molecularly defined burkitt lymphomas are frequently myc-negative and characterized by the 11q-gain/loss pattern, *haematologica* 2015; 100:e275–e279.
- [92] I. Scarfò, E. Pellegrino, E. Mereu, I. Kwee, L. Agnelli, E. Bergaggio, G. Garaffo, N. Vitale, M. Caputo, R. Machiorlatti *et al.*, Identification of a new subclass of alk-negative *alcl* expressing aberrant levels of *erbb4* transcripts, *Blood* 2016; 127:221–232.
- [93] D. Pyeon, M. A. Newton, P. F. Lambert, J. A. Den Boon, S. Sengupta, C. J. Marsit, C. D. Woodworth, J. P. Connor, T. H. Haugen, E. M. Smith *et al.*, Fundamental differences in cell cycle deregulation in human papillomavirus-positive and human papillomavirus-negative head/neck and cervical cancers, *Cancer research* 2007; 67:4605–4619.
- [94] D. Sturm, B. A. Orr, U. H. Toprak, V. Hovestadt, D. T. Jones, D. Capper, M. Sill, I. Buchhalter, P. A. Northcott, I. Leis *et al.*, New brain tumor entities emerge from molecular classification of cns-pnets, *Cell* 2016; 164:1060–1072.

- [95] A. I. Riker, S. A. Enkemann, O. Fodstad, S. Liu, S. Ren, C. Morris, Y. Xi, P. Howell, B. Metge, R. S. Samant *et al.*, The gene expression profiles of primary and metastatic melanoma yields a transition point of tumor progression and metastasis, *BMC medical genomics* 2008; 1:1.
- [96] P. Van Loo, T. Tousseyn, V. Vanhentenrijk, D. Dierickx, A. Malecka, I. V. Bempt, G. Verhoef, J. Delabie, P. Marynen, P. Matthys *et al.*, T cell/histiocyte rich large b-cell lymphoma shows transcriptional features suggestive of a tolerogenic host immune response, *Haematologica* 2009; haematol-2009.
- [97] J. M. Koeman, R. C. Russell, M.-H. Tan, D. Petillo, M. Westphal, K. Koelzer, J. L. Metcalf, Z. Zhang, D. Matsuda, K. J. Dykema *et al.*, Somatic pairing of chromosome 19 in renal oncocytoma is associated with deregulated elgn2-mediated oxygen-sensing response, *PLoS Genet* 2008; 4:e1000176.
